# Supplementary material for: Thiol-ene "Click" Synthesis and Pharmacological Evaluation of C-Glycoside sp2-Iminosugar Glycolipids
Source: PubMed Central journal article supplement (PMC6720825; doi:10.3390/molecules24162882), 2019-08-08
Supplement: molecules-24-02882-s001.pdf [file molecules-24-02882-s001.pdf]

# Thiol-ene "click" synthesis and pharmacological evaluation of C-glycoside $sp^2$ -iminosugar glycolipids

Elena M. Sánchez-Fernández<sup>1,\*</sup>, M. Isabel García-Moreno<sup>1</sup>, Raquel García-Hernández<sup>2</sup>, José M. Padrón<sup>3</sup>, José M. García Fernández<sup>4</sup>, Francisco Gamarro<sup>2</sup>, Carmen Ortiz Mellet<sup>1,\*</sup>

## Supplementary Information

### List of contents

- |                   |                                                                                  |
|-------------------|----------------------------------------------------------------------------------|
| <b>S1 to S28</b>  | NMR spectra of new C-glycoside $sp^2$ -iminosugars.                              |
| <b>S29 to S45</b> | Dixon and Lineweaver-Burk plots for $K_i$ determination                          |
| <b>S46</b>        | Anti-proliferative activity ( $GI_{50}$ ) of new C-glycoside $sp^2$ -iminosugars |

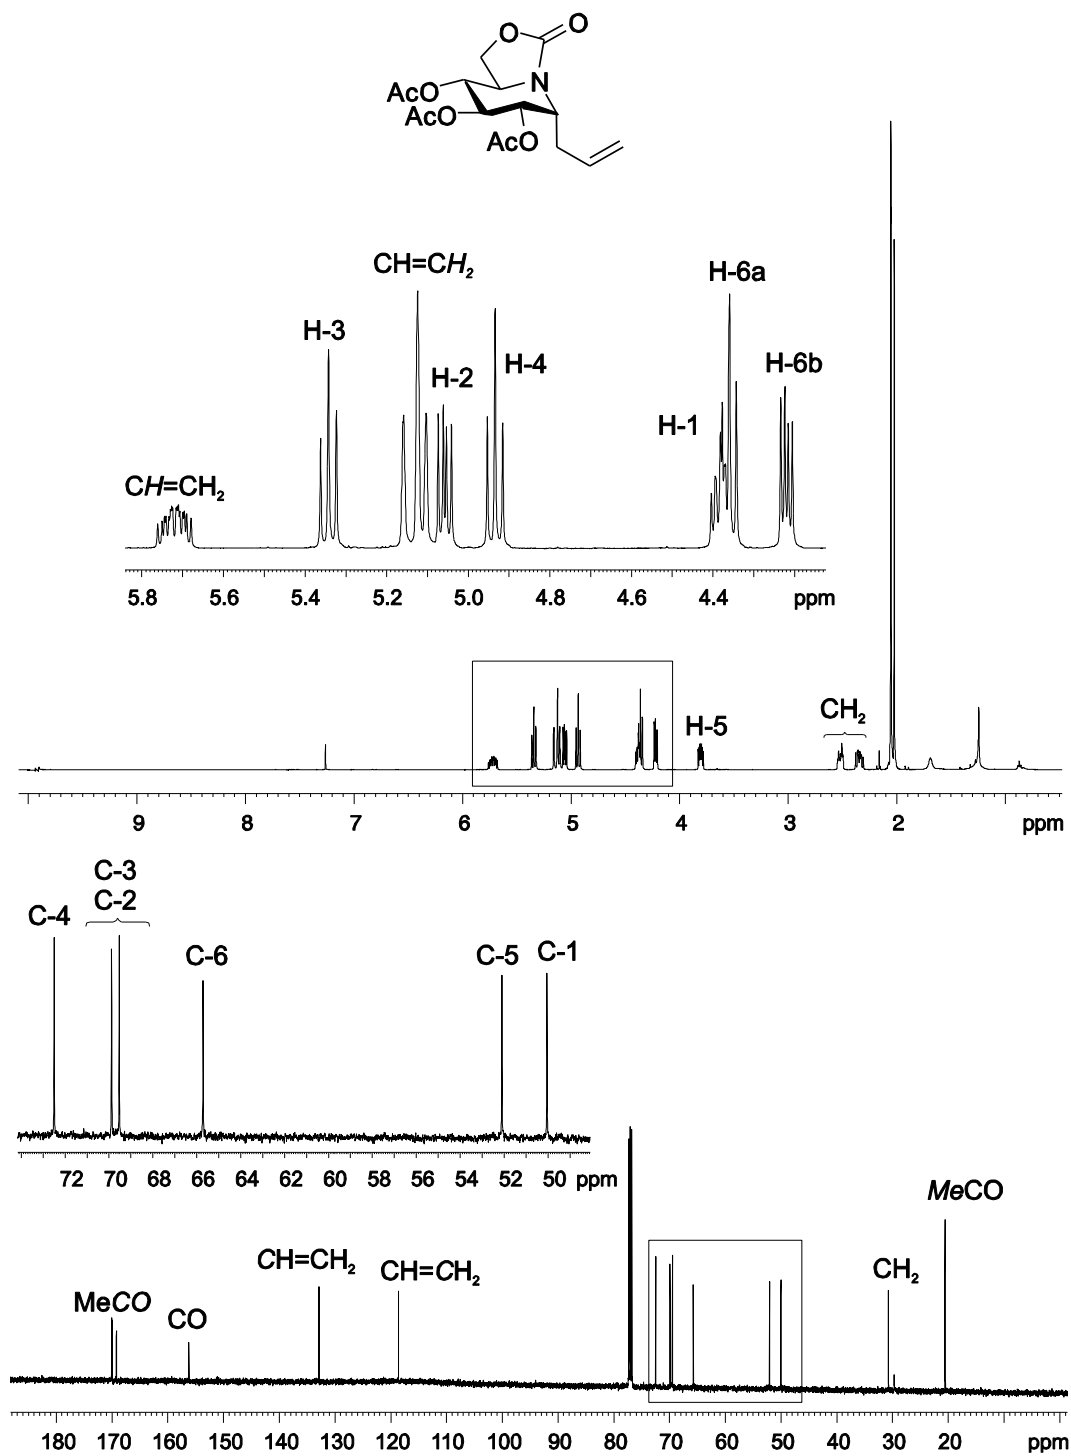

Figure S1.  $^1\text{H}$  and  $^{13}\text{C}$  NMR spectra (500 MHz and 125.7 MHz,  $\text{CDCl}_3$ ) of **14**.

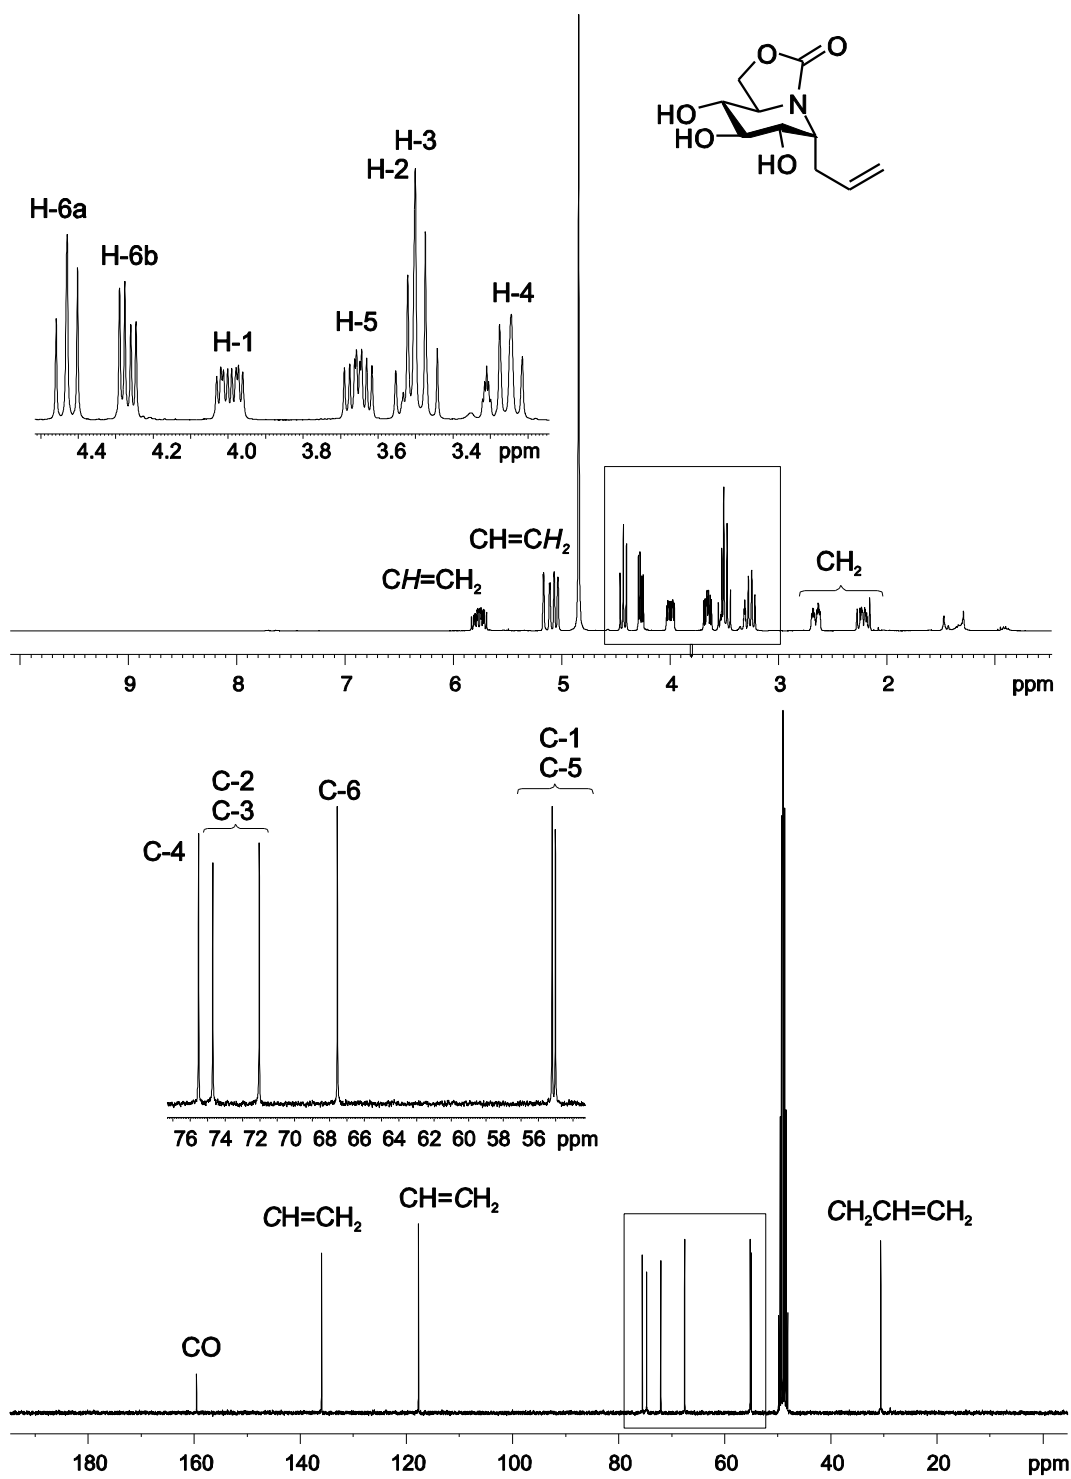

Figure S2.  $^1\text{H}$  and  $^{13}\text{C}$  NMR spectra (300 MHz and 75.5 MHz,  $\text{CD}_3\text{OD}$ ) of **15**.

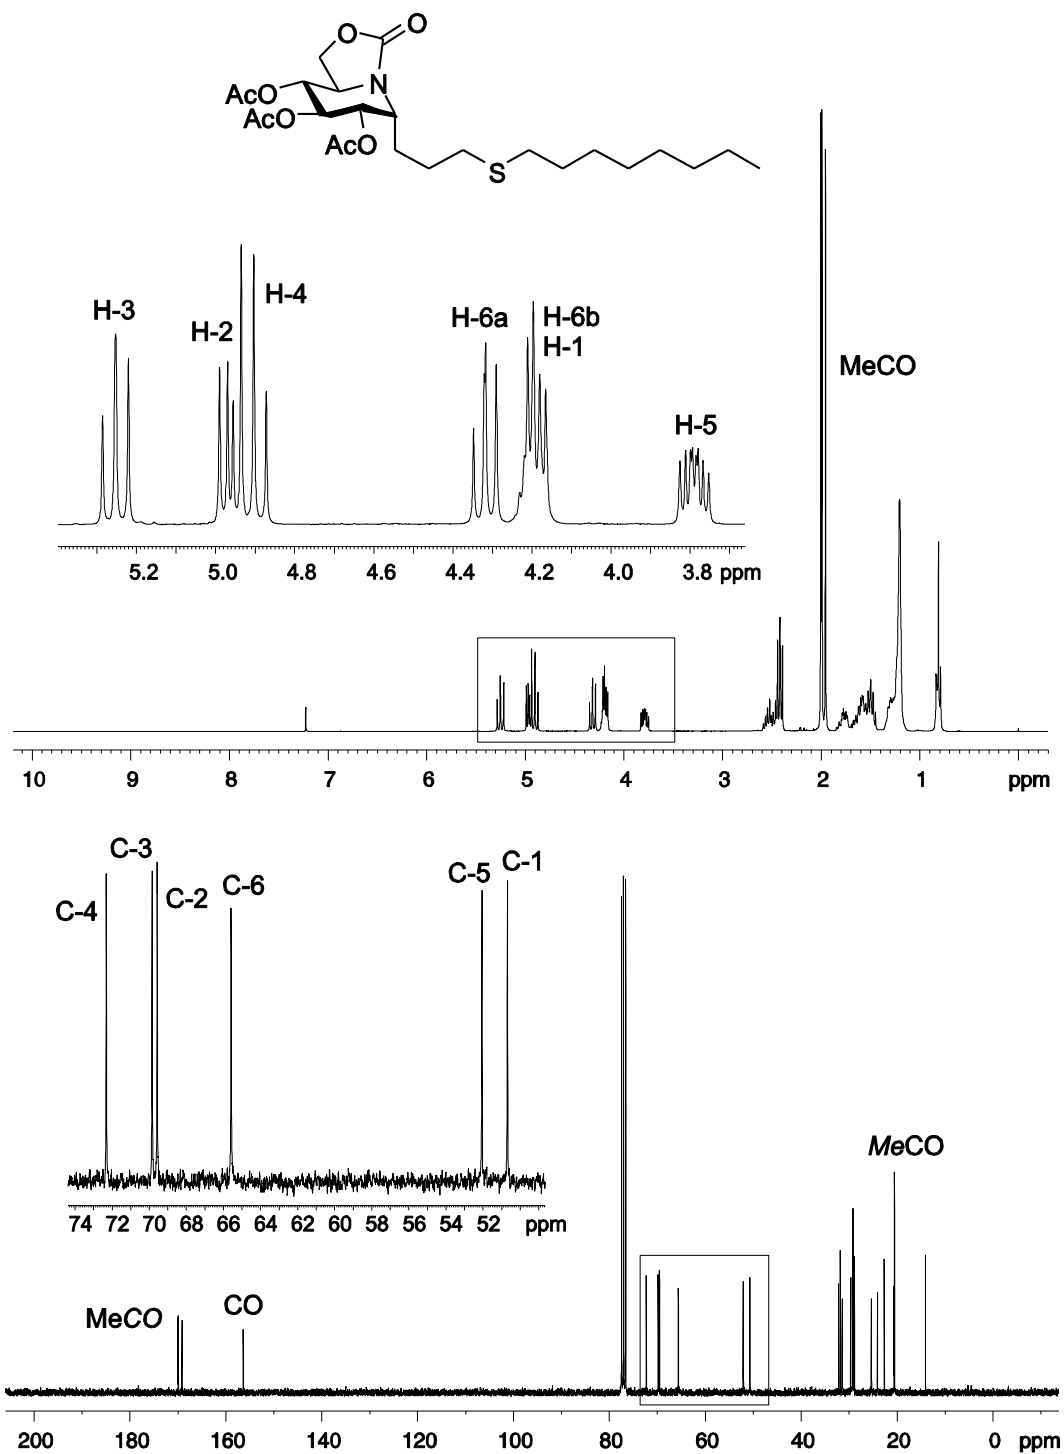

Figure S3. <sup>1</sup>H and <sup>13</sup>C NMR spectra (300 MHz and 75.5 MHz, CDCl<sub>3</sub>) of 16.

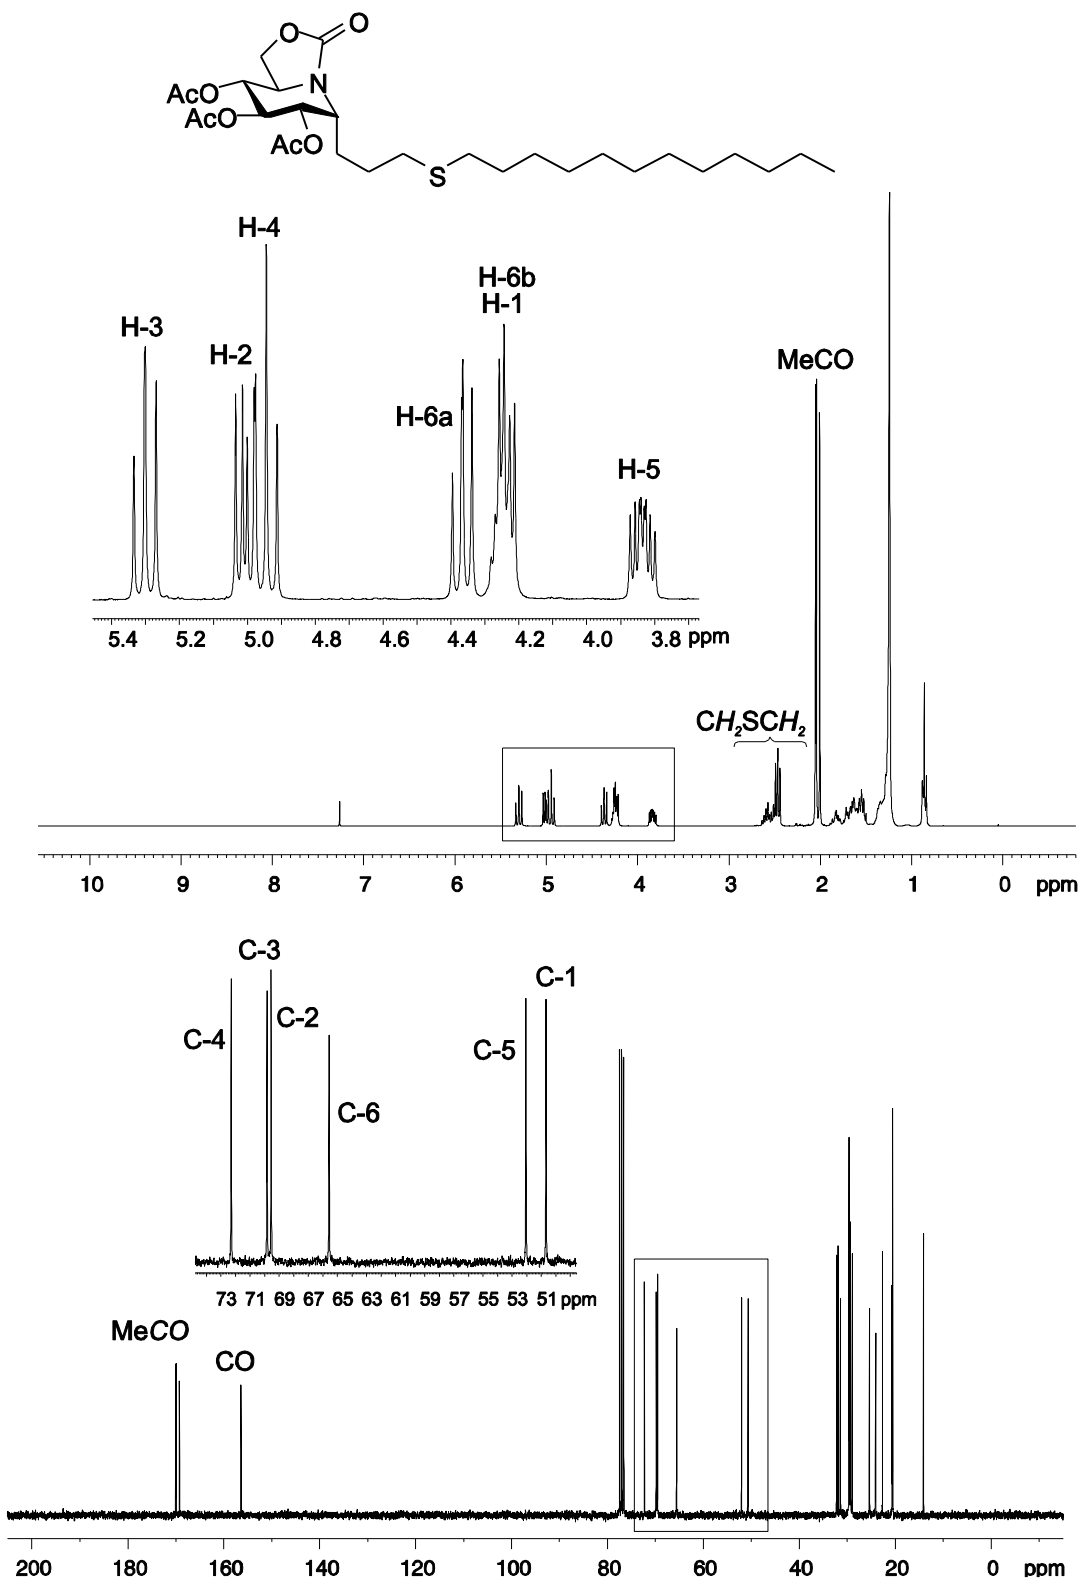

Figure S4. <sup>1</sup>H and <sup>13</sup>C NMR spectra (300 MHz and 75.5 MHz, CDCl<sub>3</sub>) of 17.

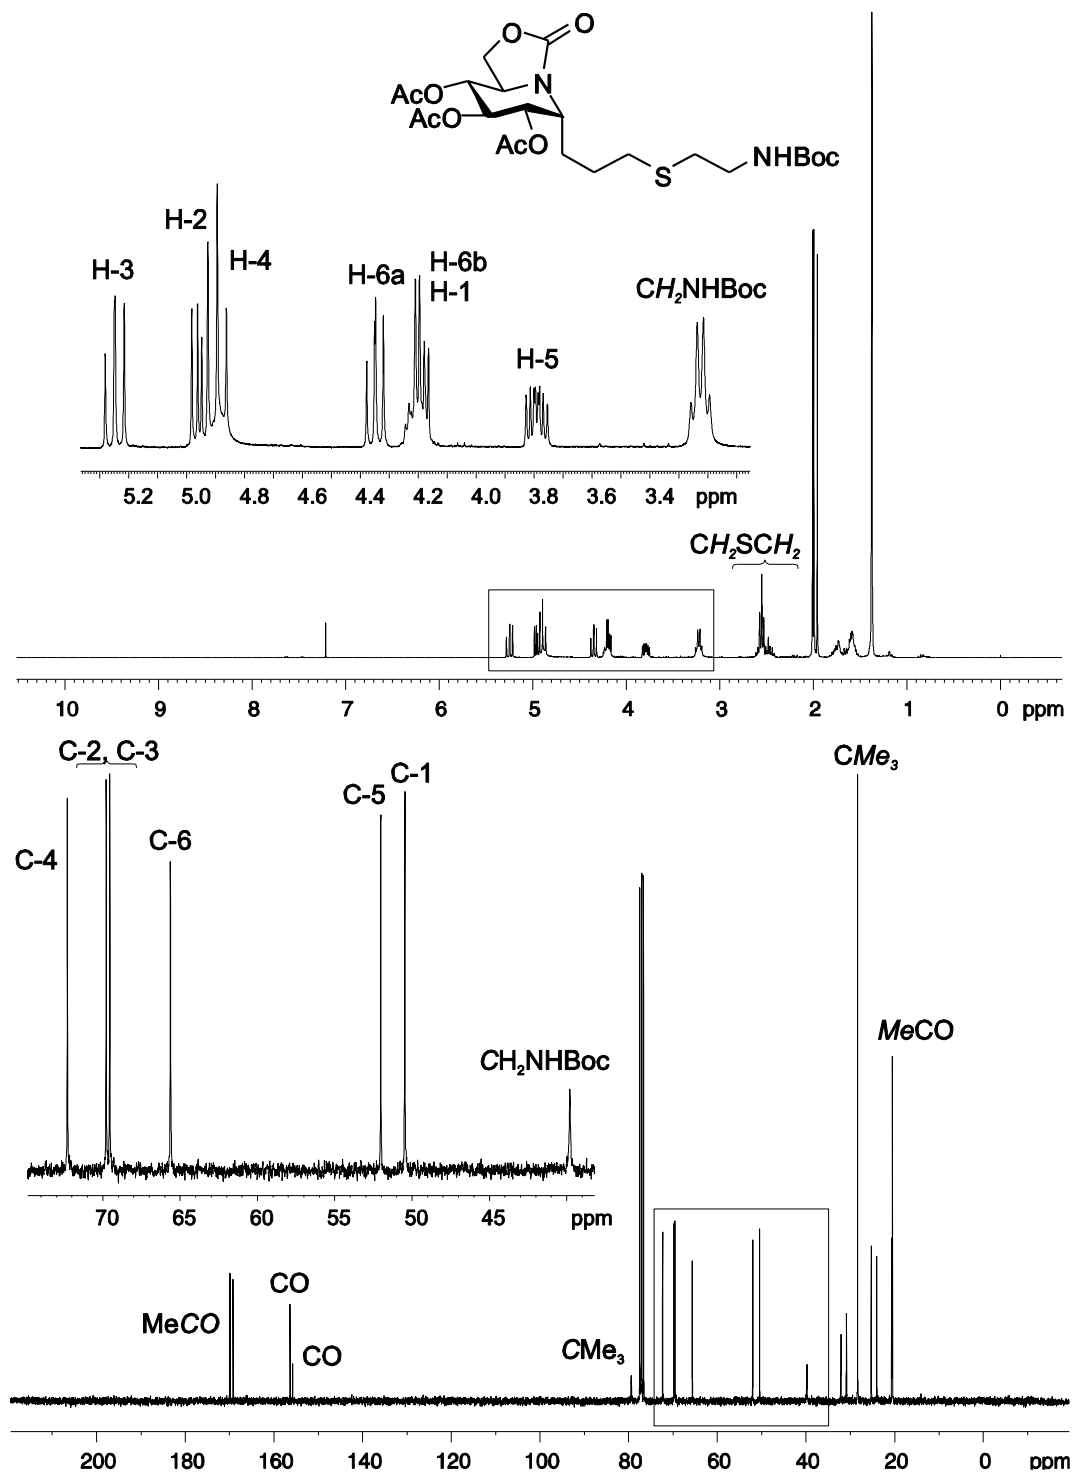

Figure S5.  $^1\text{H}$  and  $^{13}\text{C}$  NMR spectra (300 MHz and 75.5 MHz,  $\text{CDCl}_3$ ) of **18**.

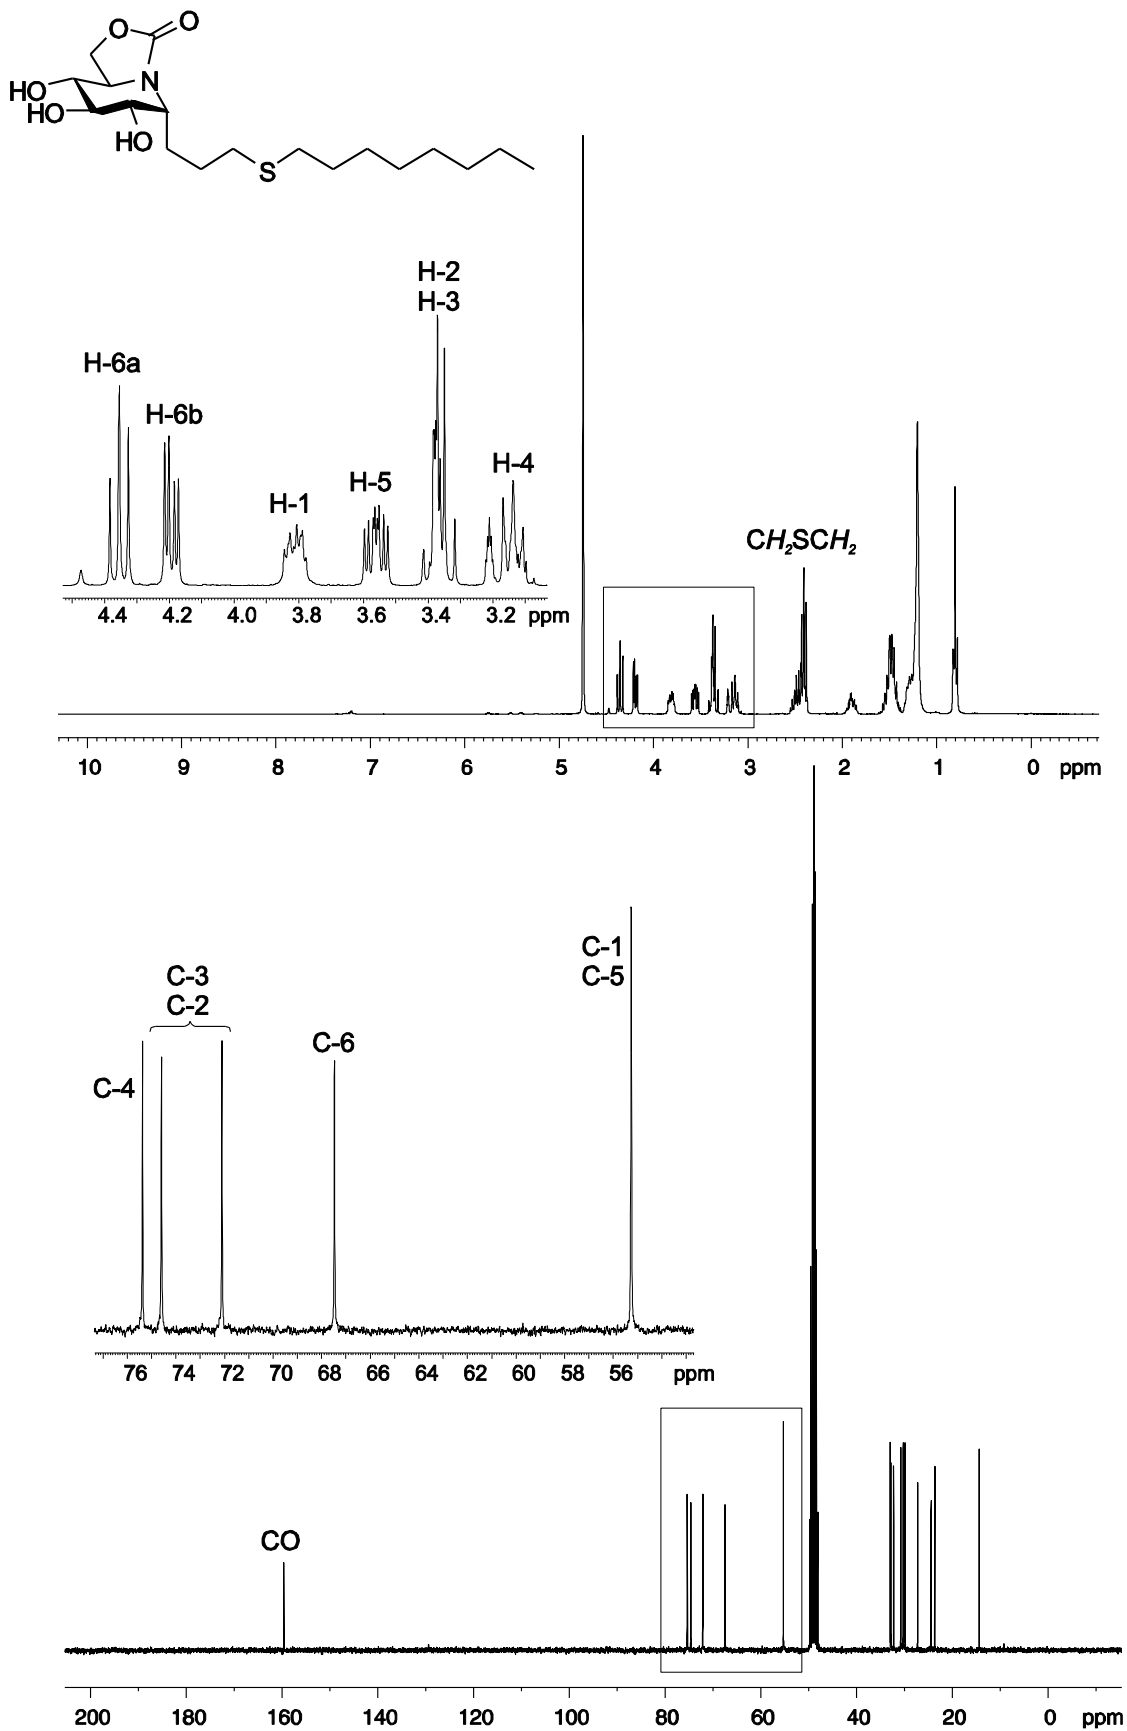

**Figure S6.**  $^1\text{H}$  and  $^{13}\text{C}$  NMR spectra (300 MHz and 75.5 MHz,  $\text{CD}_3\text{OD}$ ) of **1**.

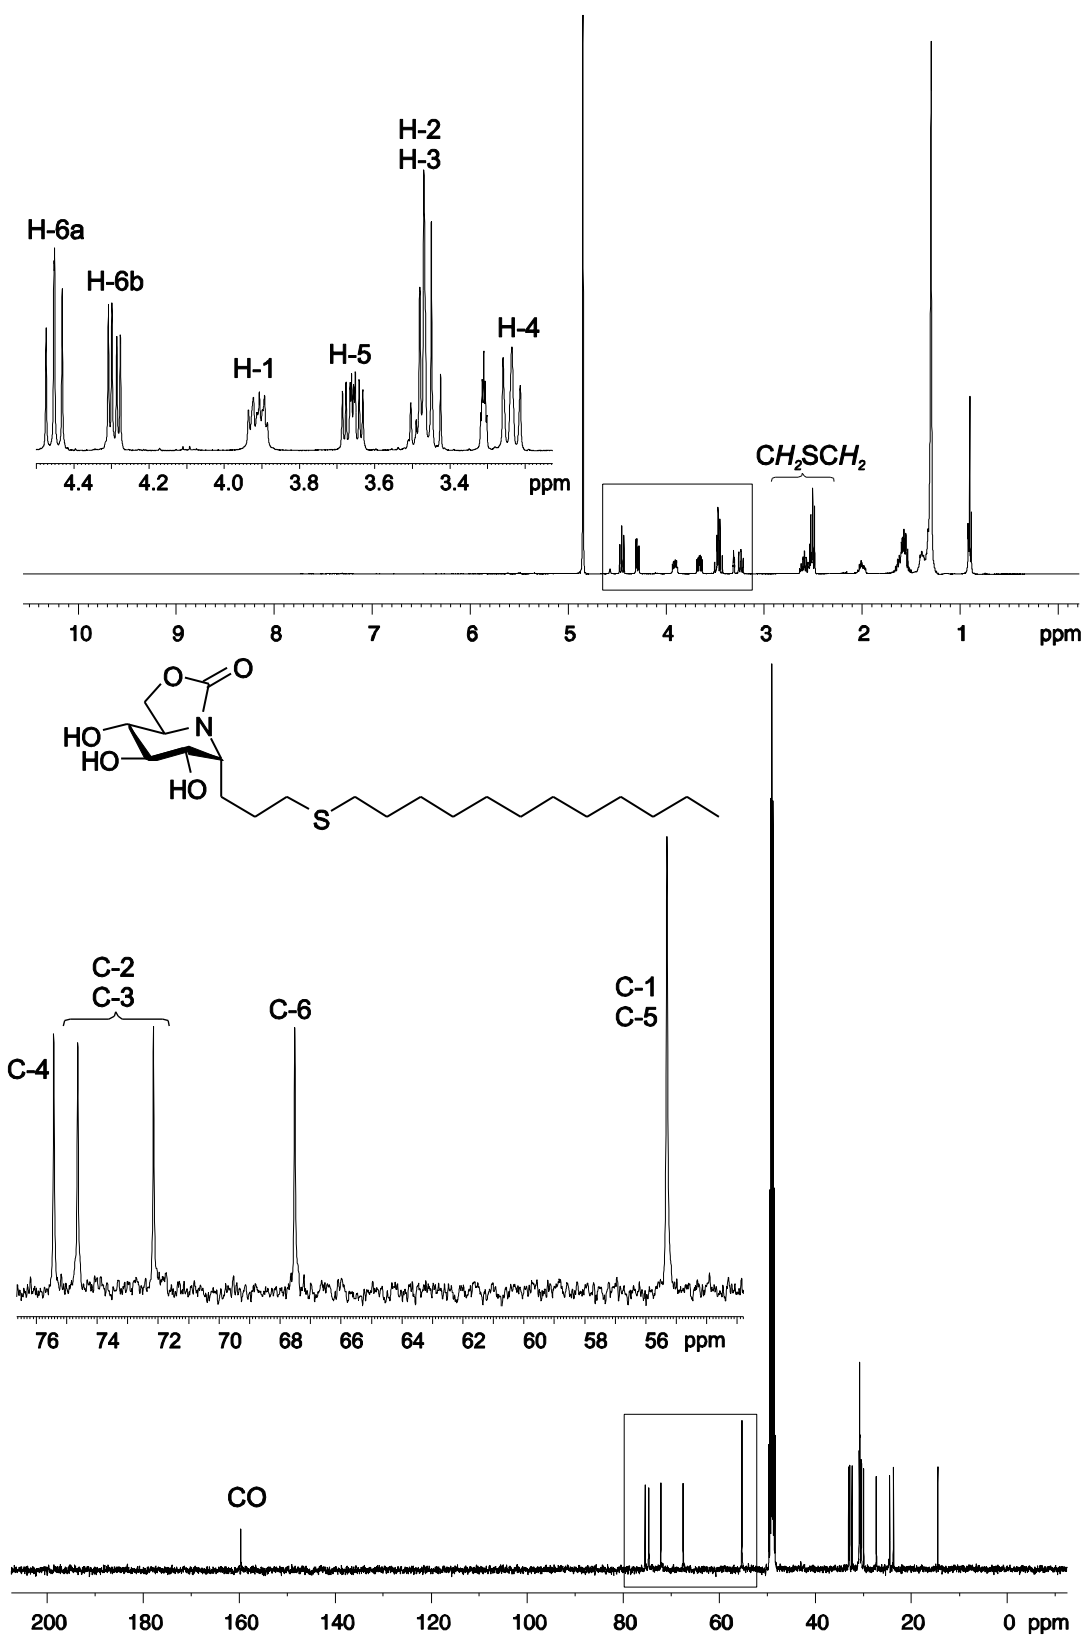

Figure S7.  $^1\text{H}$  and  $^{13}\text{C}$  NMR spectra (400 MHz and 100.6 MHz,  $\text{CD}_3\text{OD}$ ) of **2**.



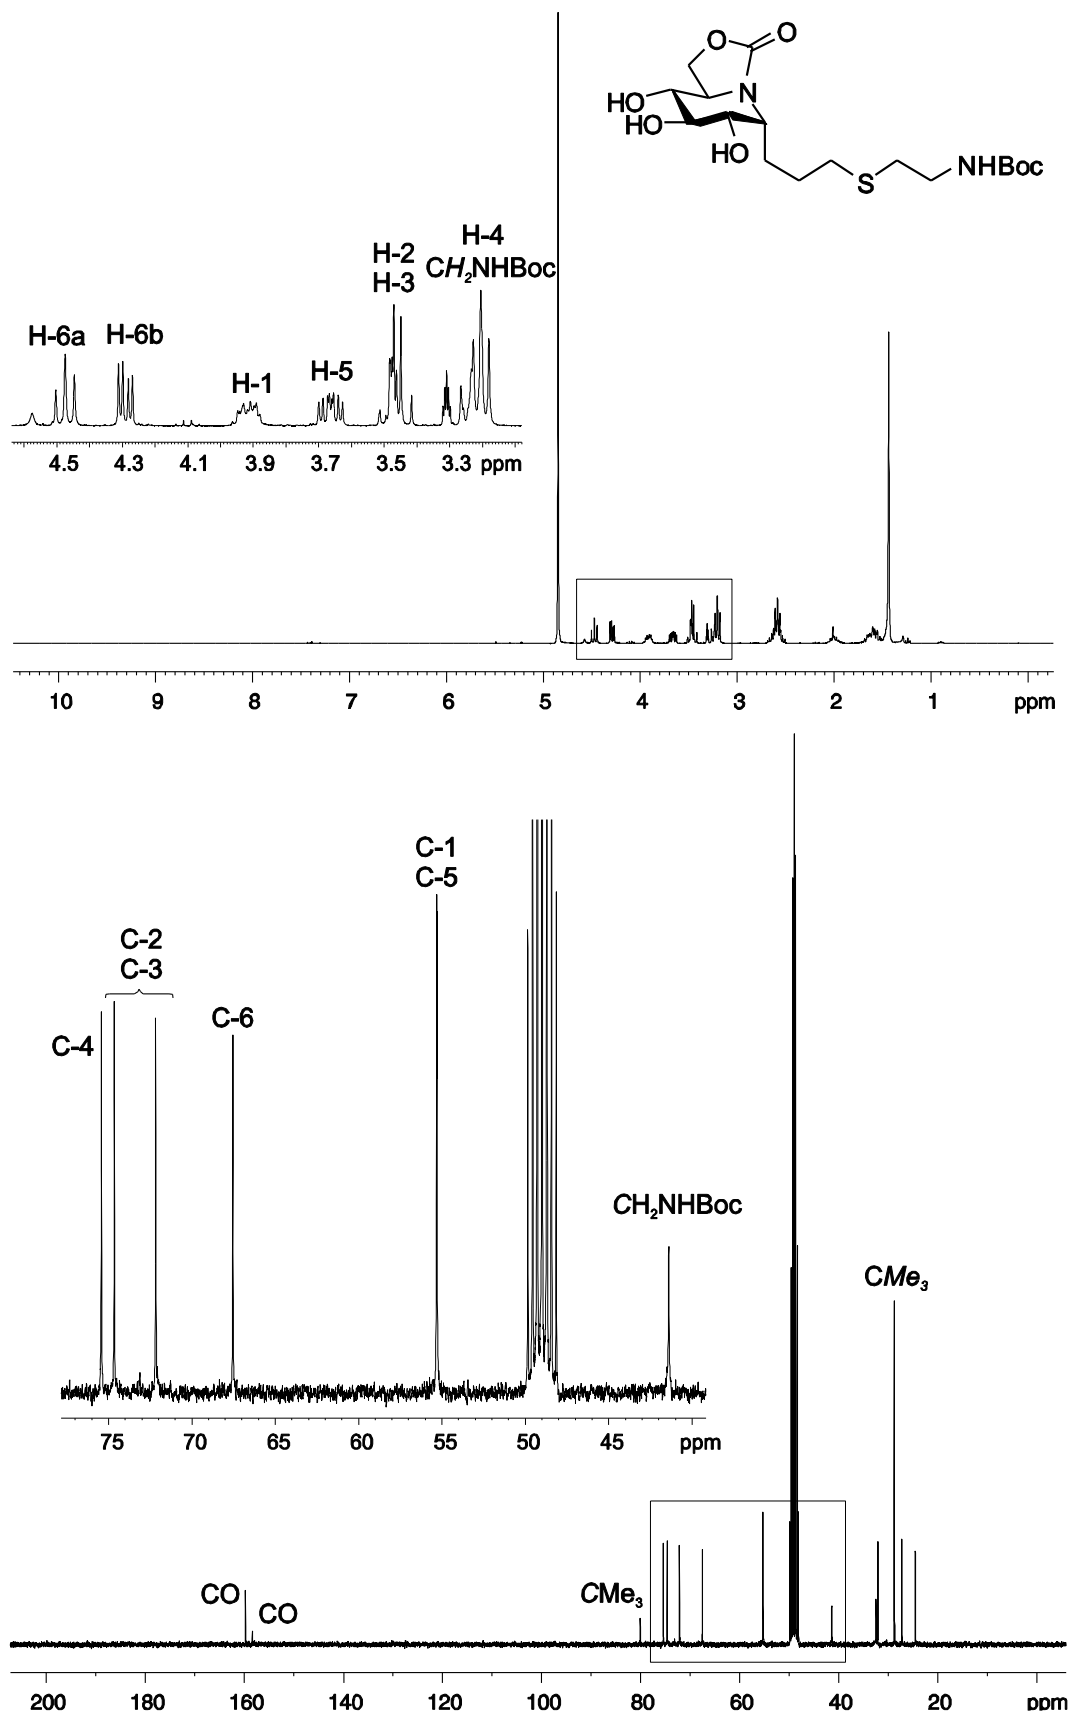

**Figure S8.**  $^1\text{H}$  and  $^{13}\text{C}$  NMR spectra (300 MHz and 75.5 MHz,  $\text{CD}_3\text{OD}$ ) of **3**.

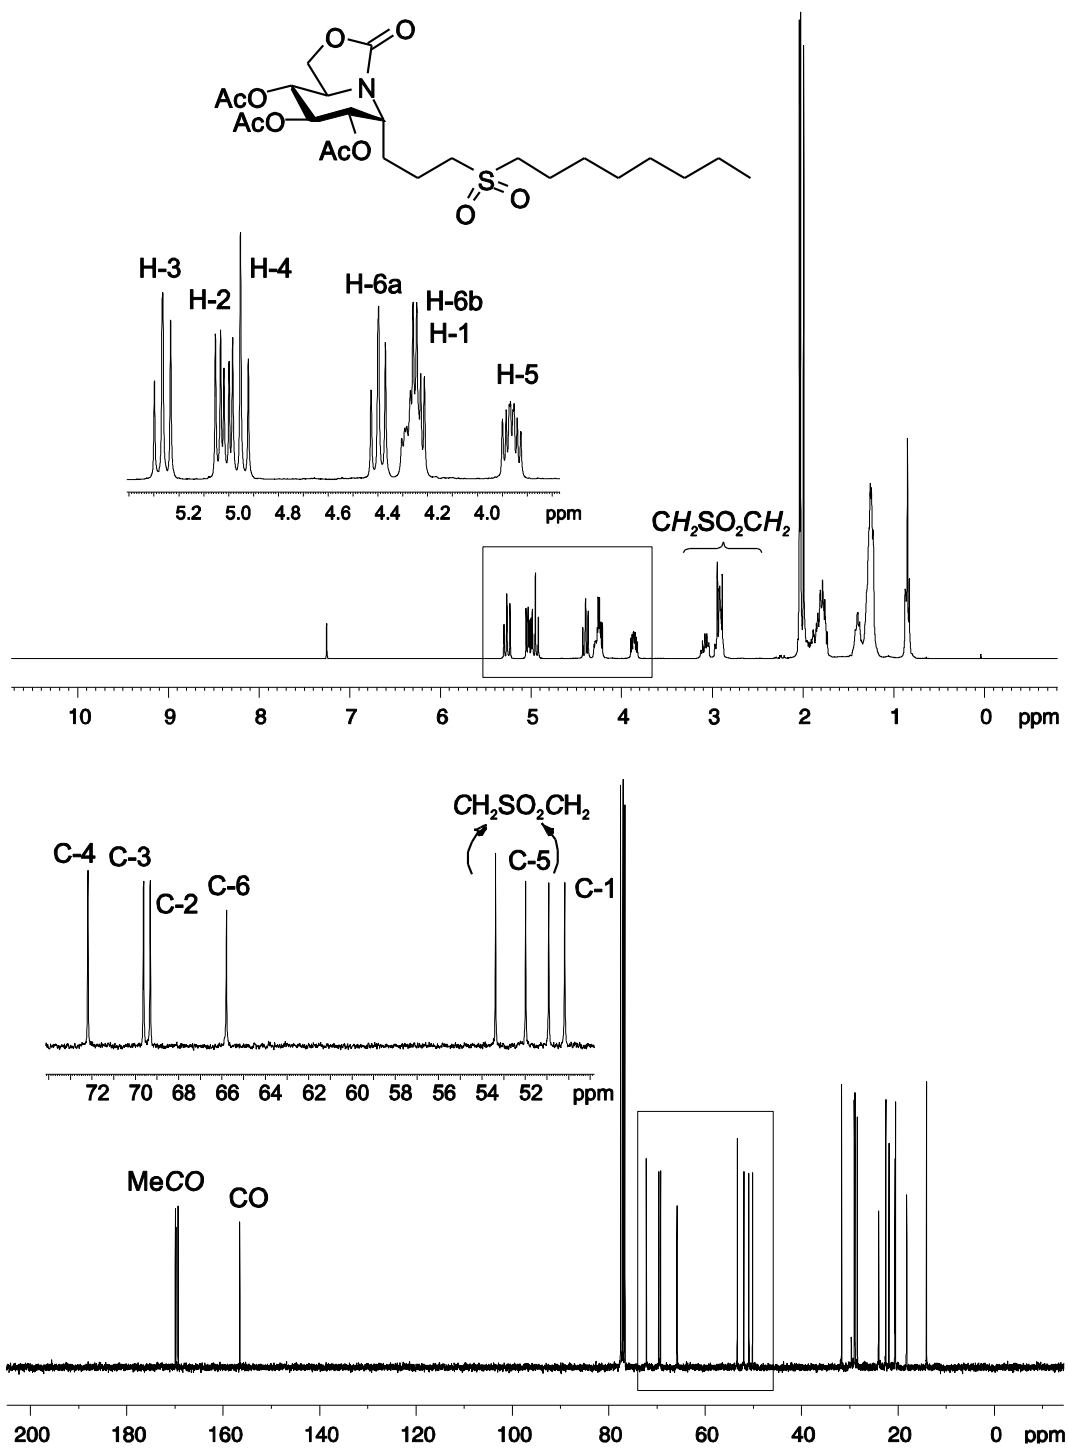

Figure S9.  $^1\text{H}$  and  $^{13}\text{C}$  NMR spectra (300 MHz and 75.5 MHz,  $\text{CDCl}_3$ ) of 19.

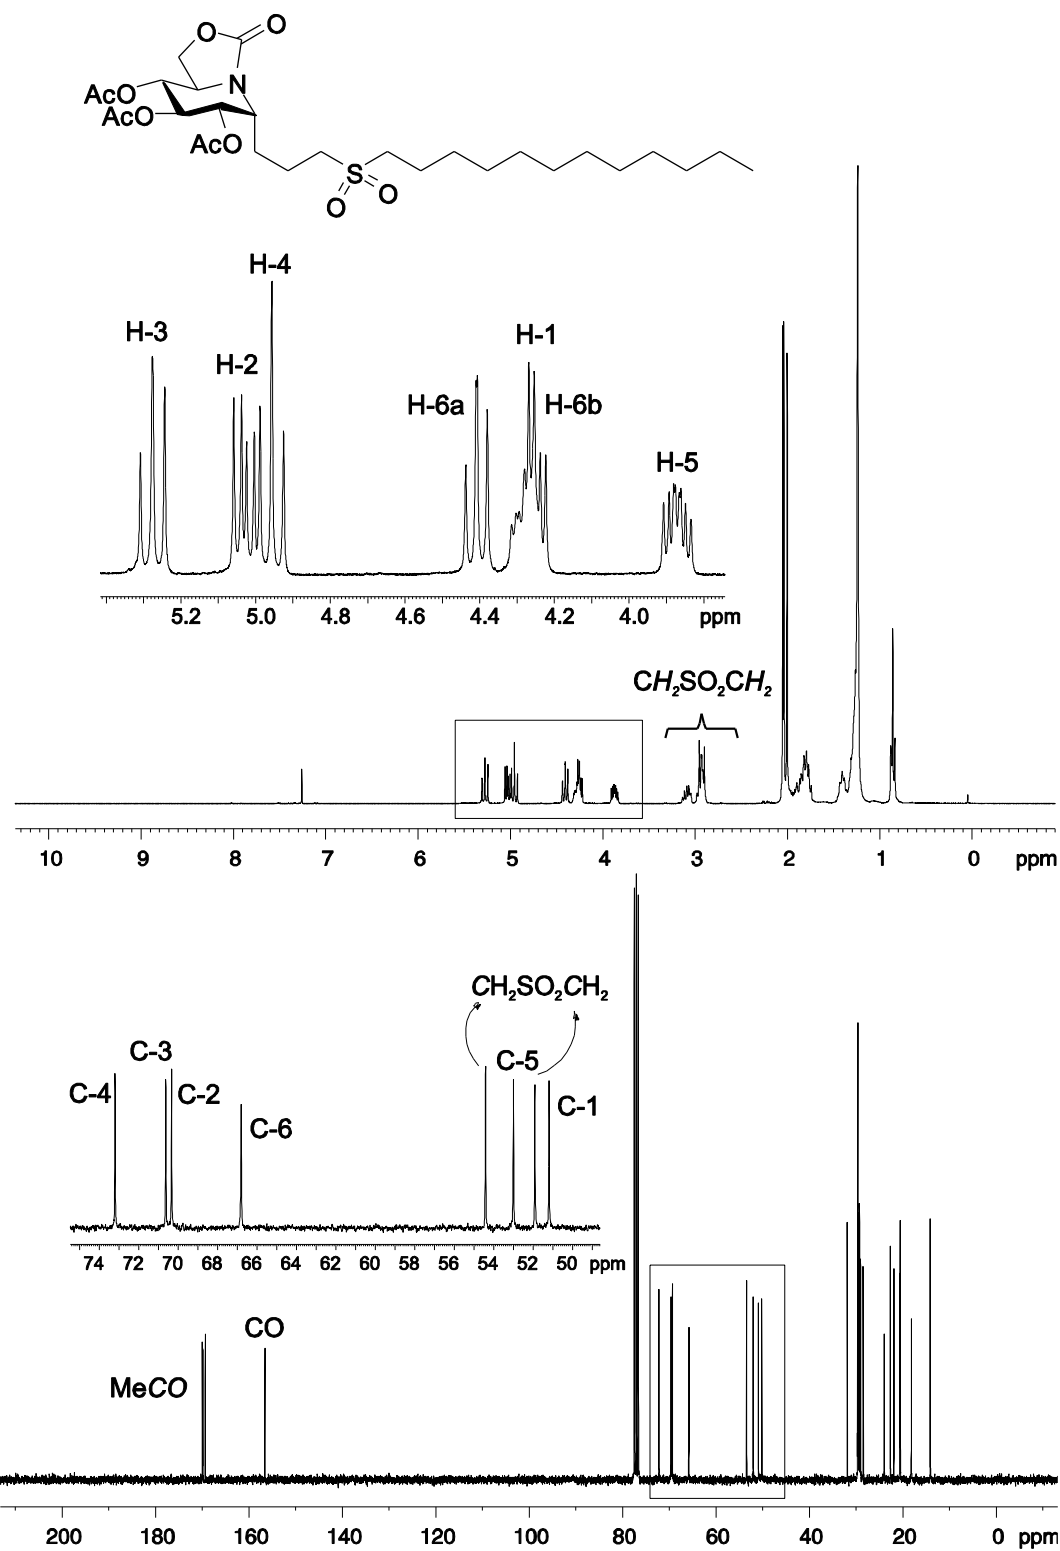

Figure S10.  $^1\text{H}$  and  $^{13}\text{C}$  NMR spectra (300 MHz and 75.5 MHz,  $\text{CDCl}_3$ ) of **20**.

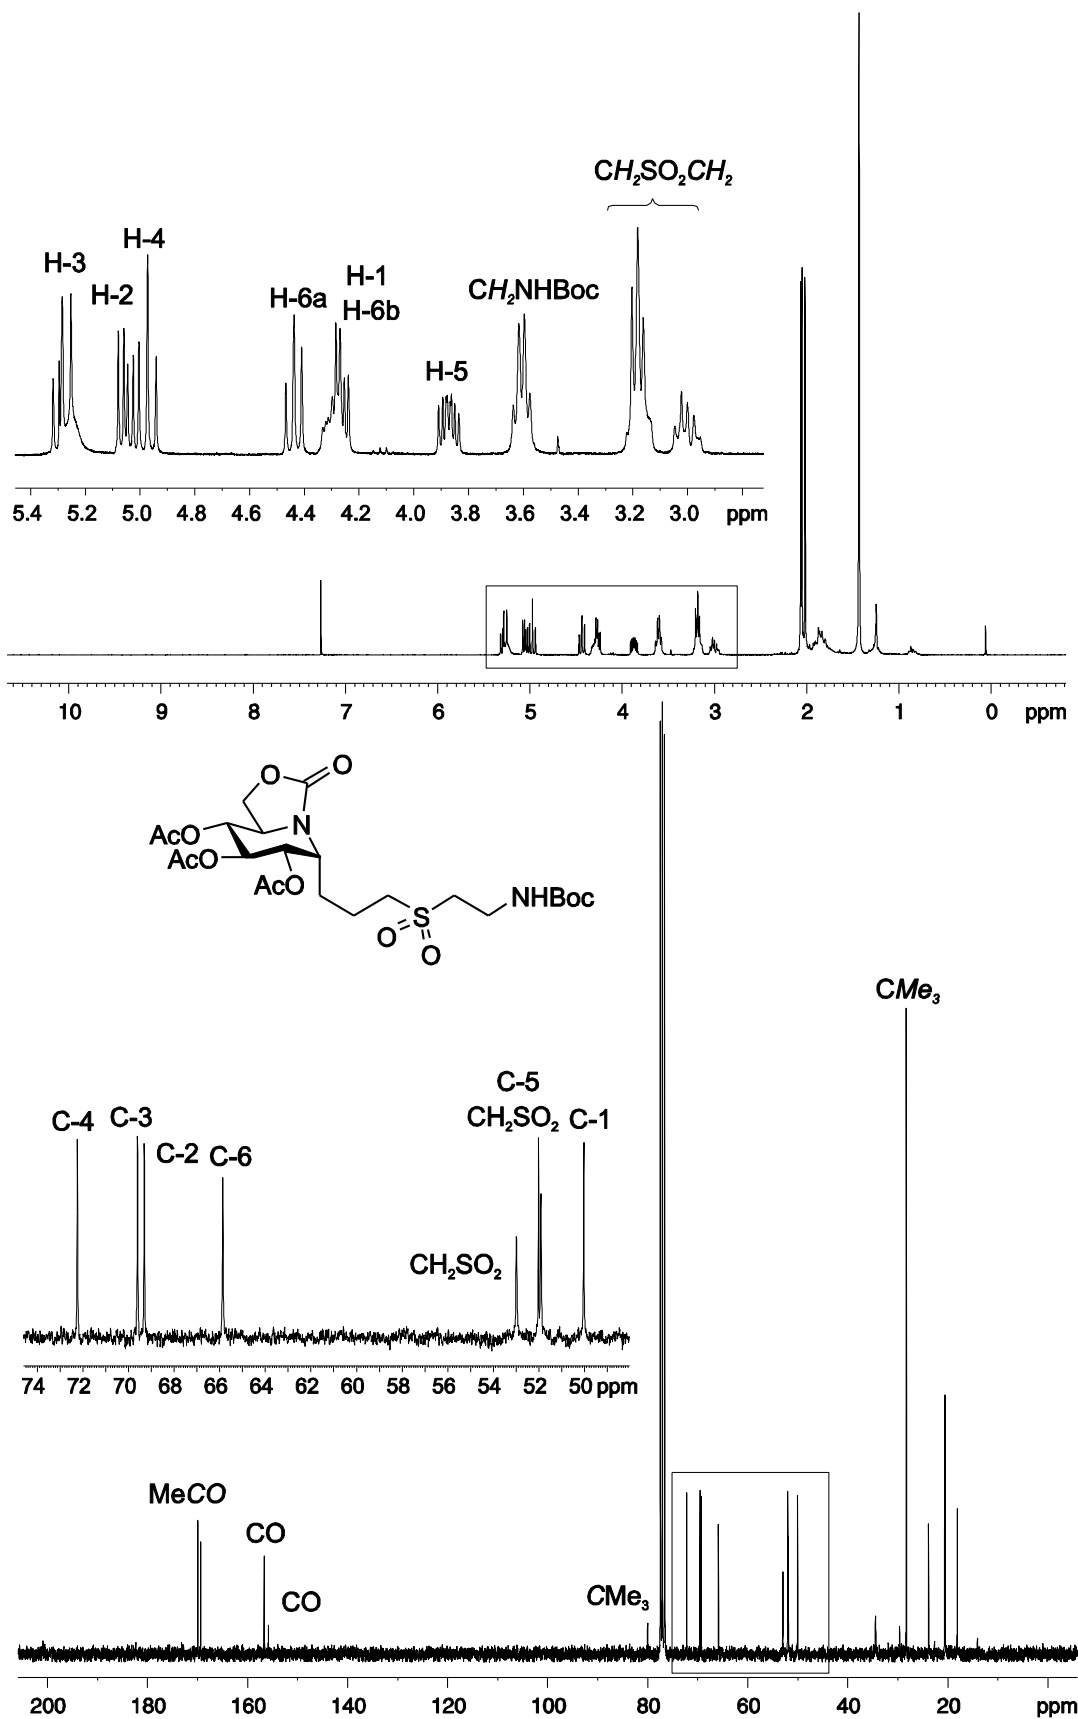

Figure S11.  $^1\text{H}$  and  $^{13}\text{C}$  NMR spectra (300 MHz and 75.5 MHz,  $\text{CDCl}_3$ ) of **21**.

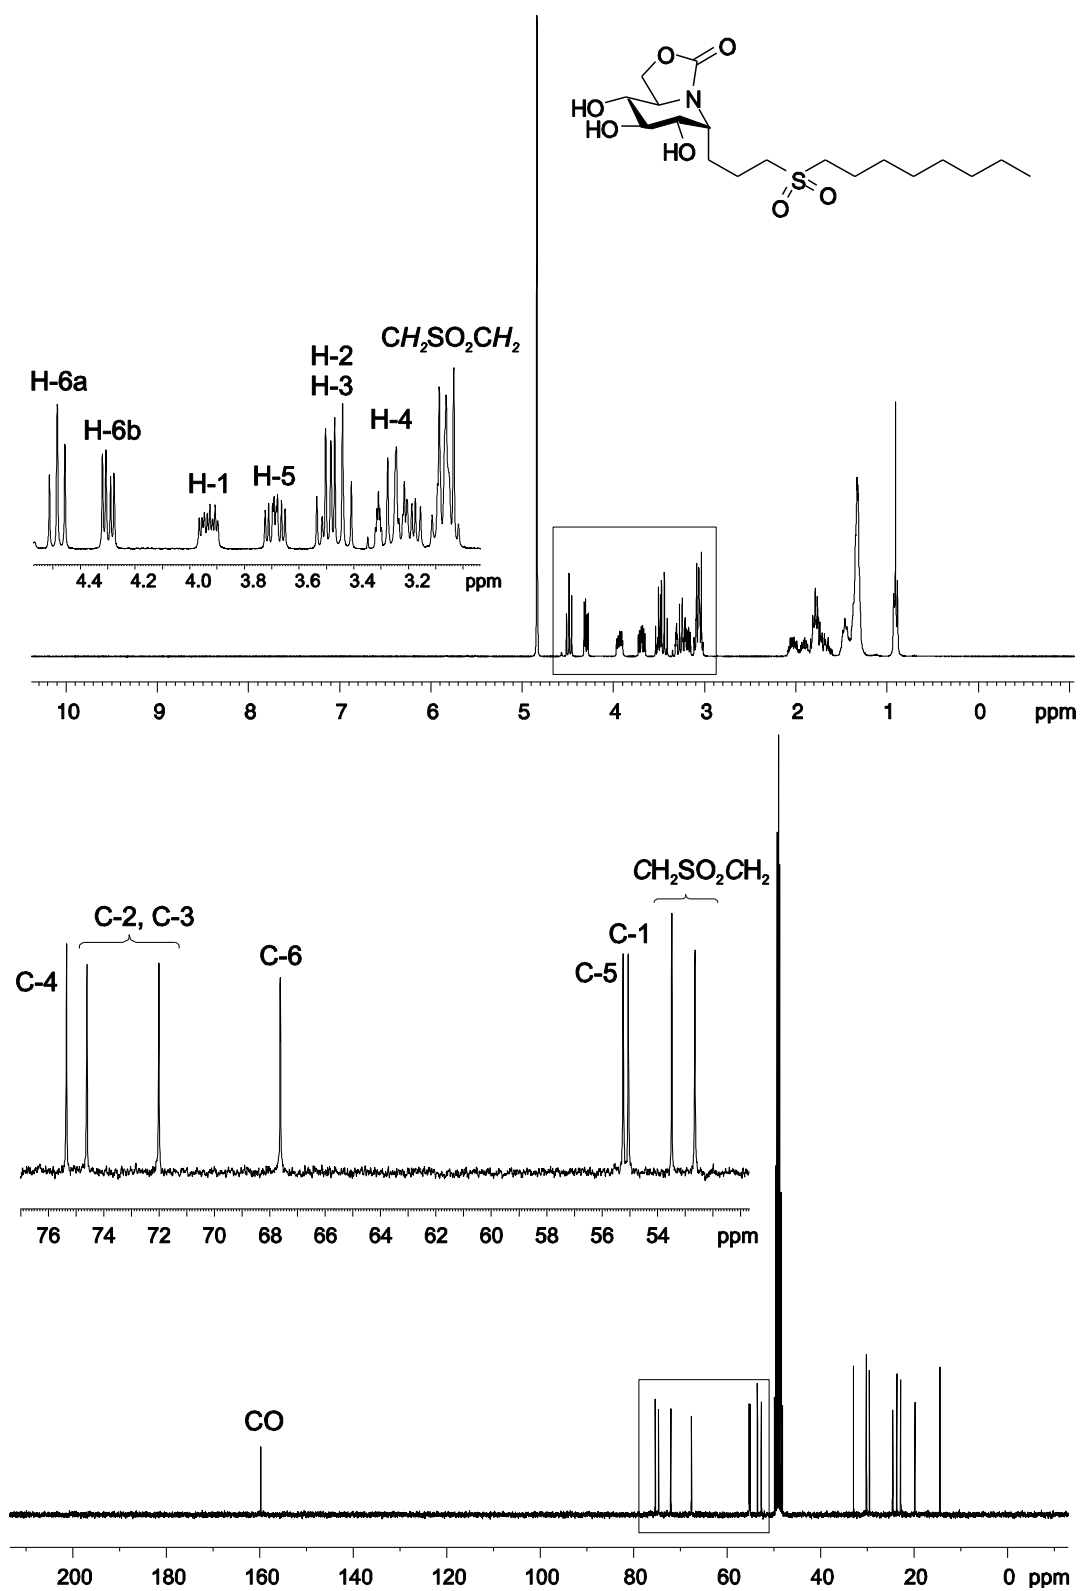

Figure S12.  $^1\text{H}$  and  $^{13}\text{C}$  NMR spectra (300 MHz and 75.5 MHz,  $\text{CD}_3\text{OD}$ ) of 4.

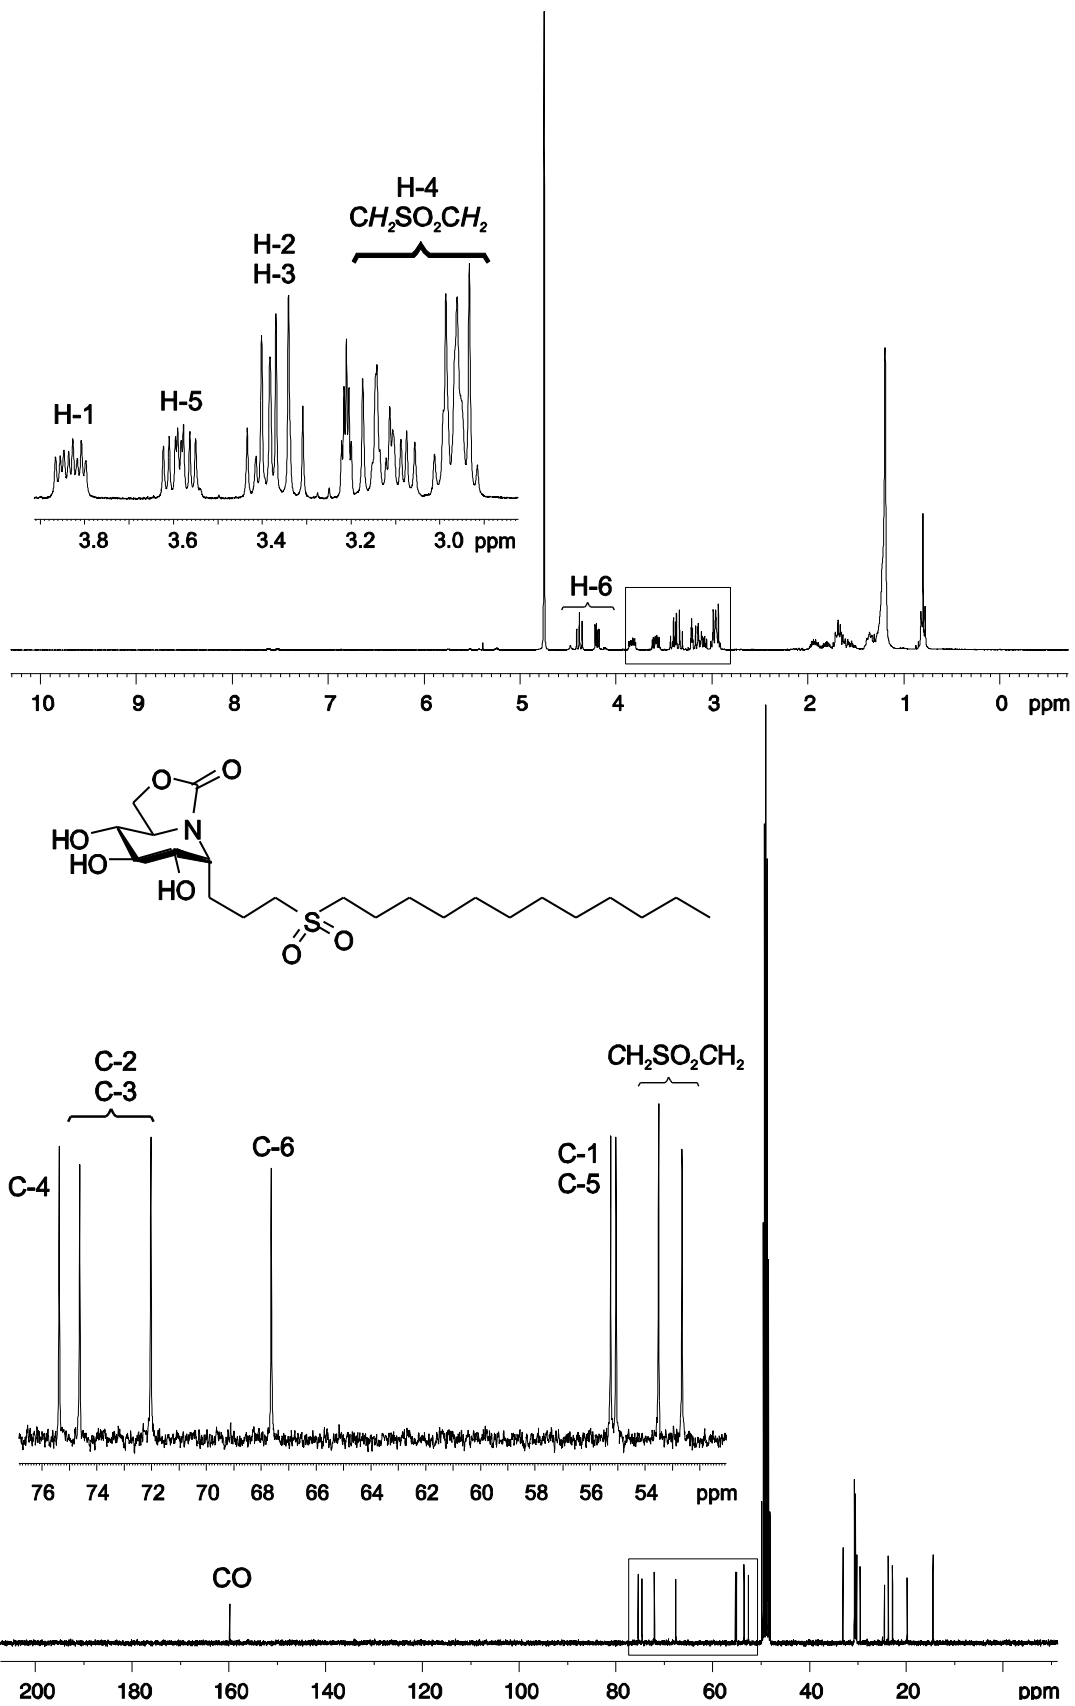

Figure S13.  $^1\text{H}$  and  $^{13}\text{C}$  NMR spectra (300 MHz and 75.5 MHz,  $\text{CD}_3\text{OD}$ ) of 5.

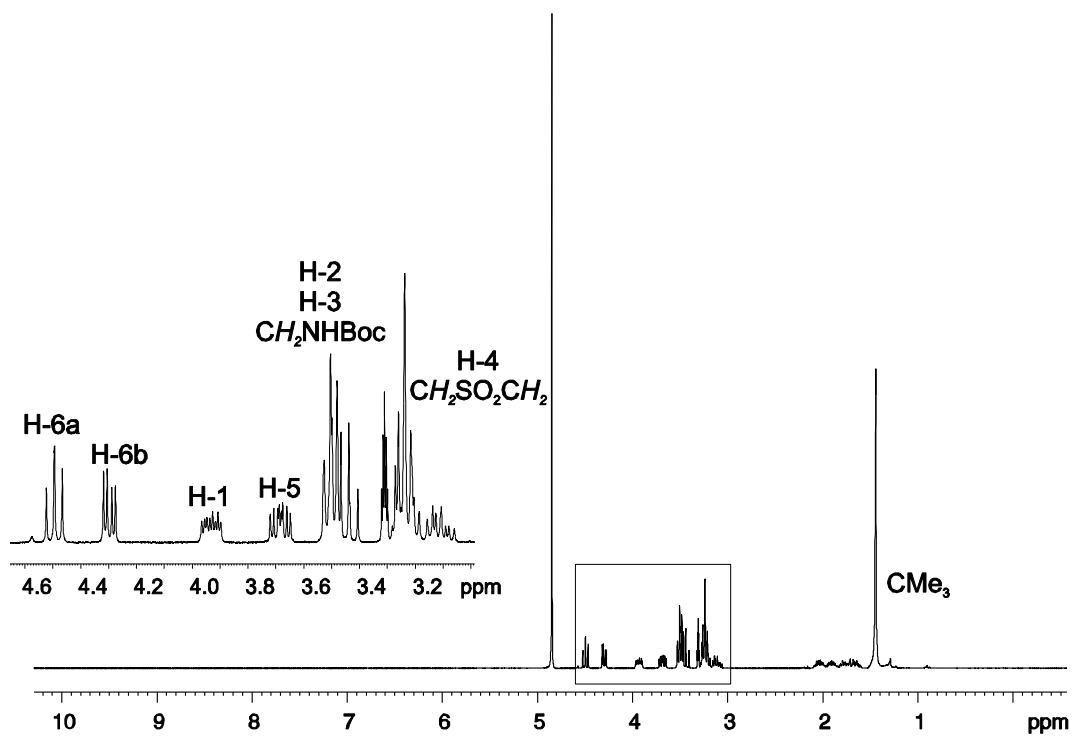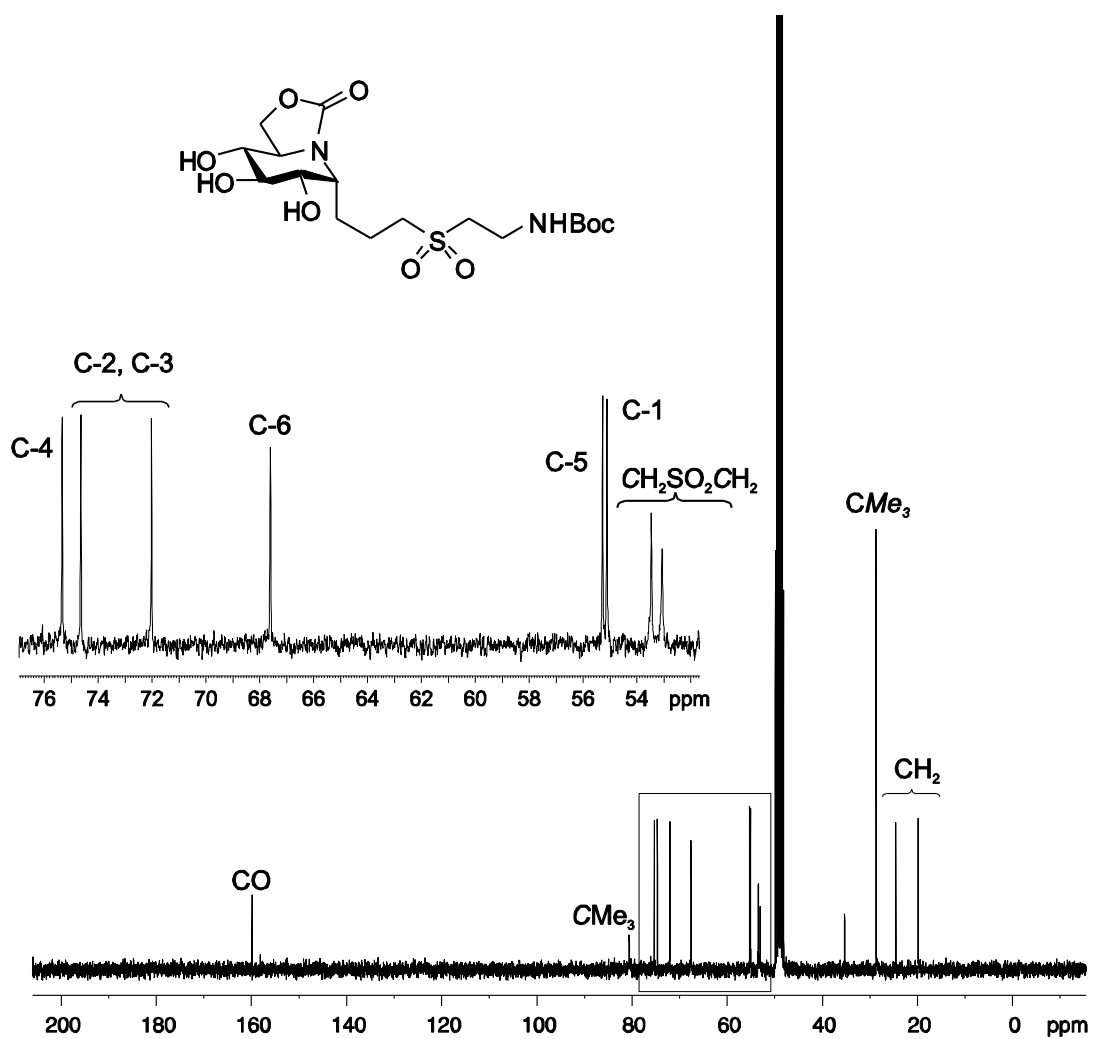

Figure S14. <sup>1</sup>H and <sup>13</sup>C NMR spectra (300 MHz and 75.5 MHz, CD<sub>3</sub>OD) of 6

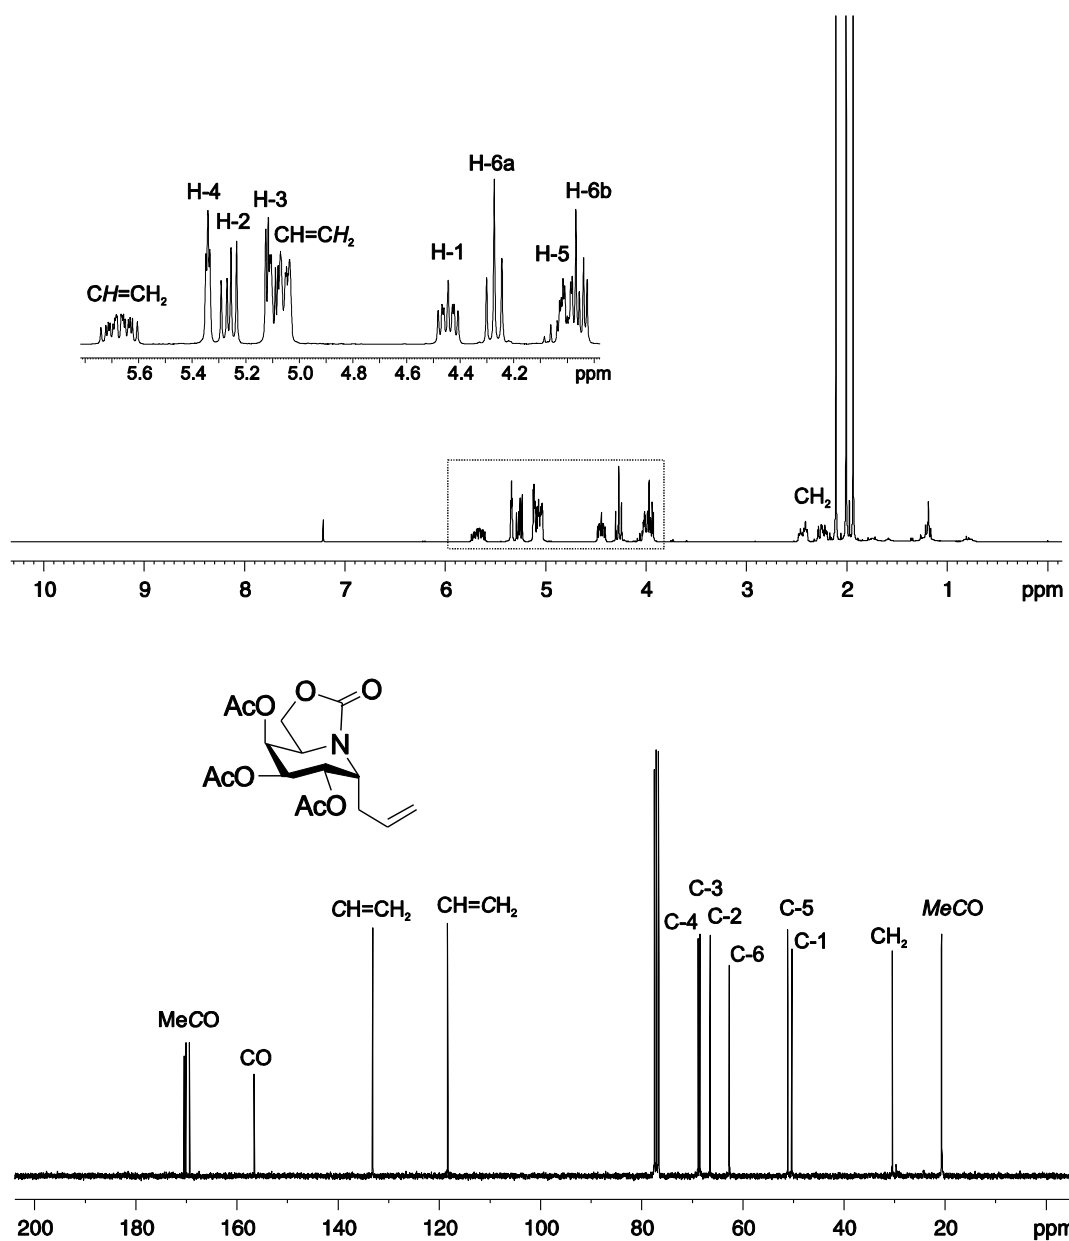

Figure S15.  $^1\text{H}$  and  $^{13}\text{C}$  NMR spectra (300 MHz and 75.5 MHz,  $\text{CDCl}_3$ ) of **23**.



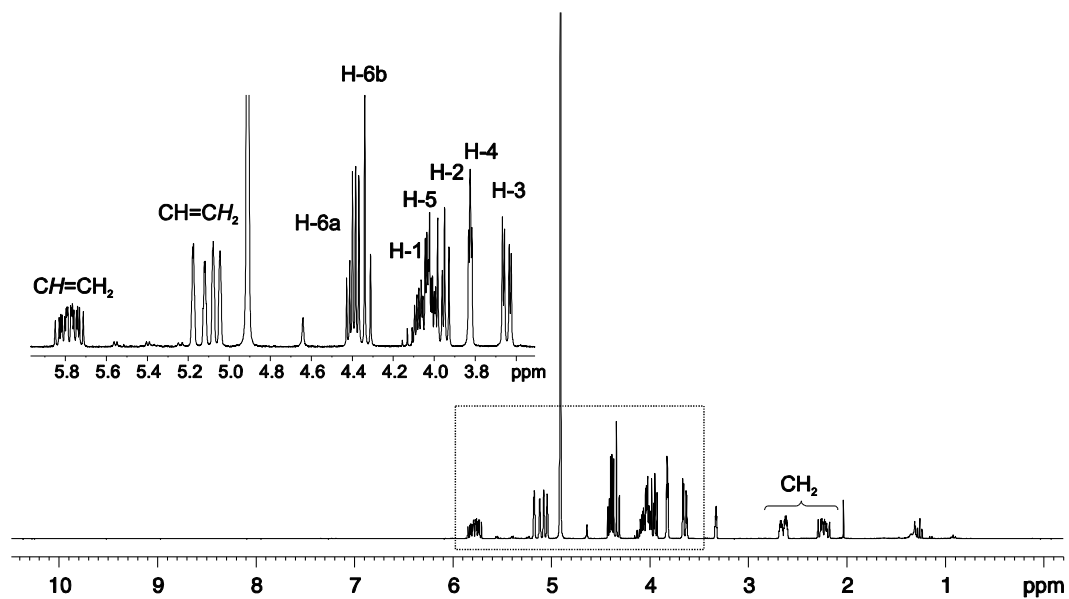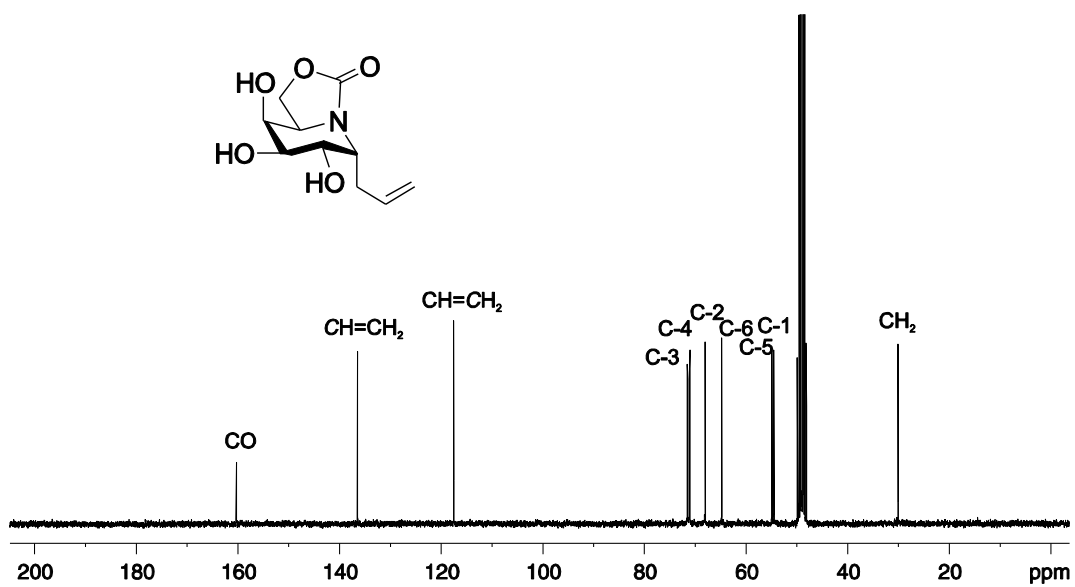

Figure S16.  $^1\text{H}$  and  $^{13}\text{C}$  NMR spectra (300 MHz and 75.5 MHz,  $\text{CD}_3\text{OD}$ ) of 24.

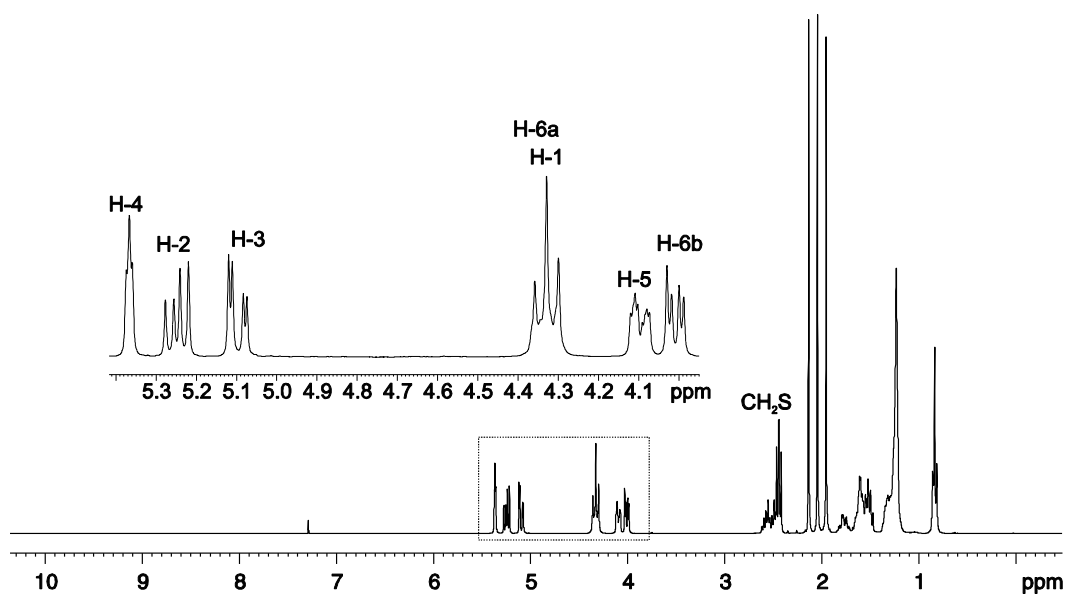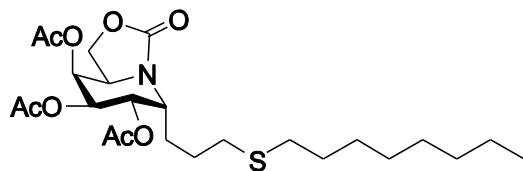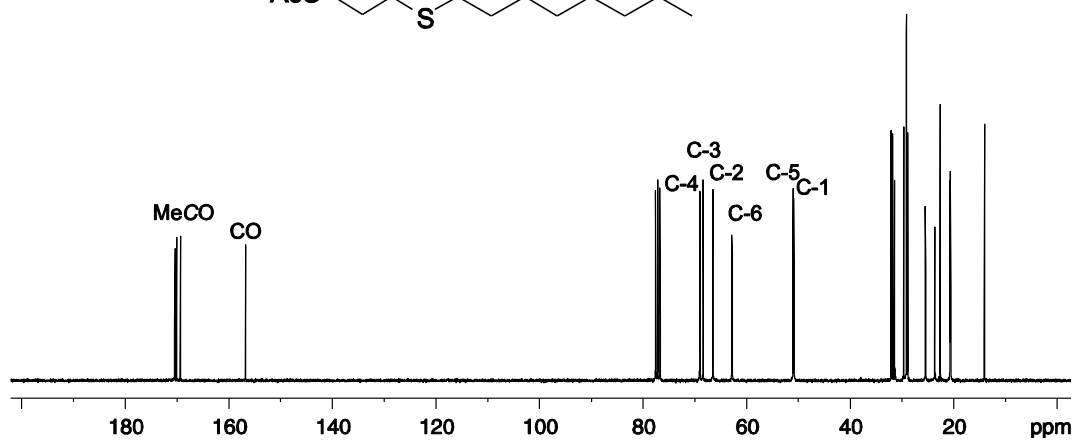

Figure S17. <sup>1</sup>H and <sup>13</sup>C NMR spectra (300 MHz and 75.5 MHz, CDCl<sub>3</sub>) of 25.

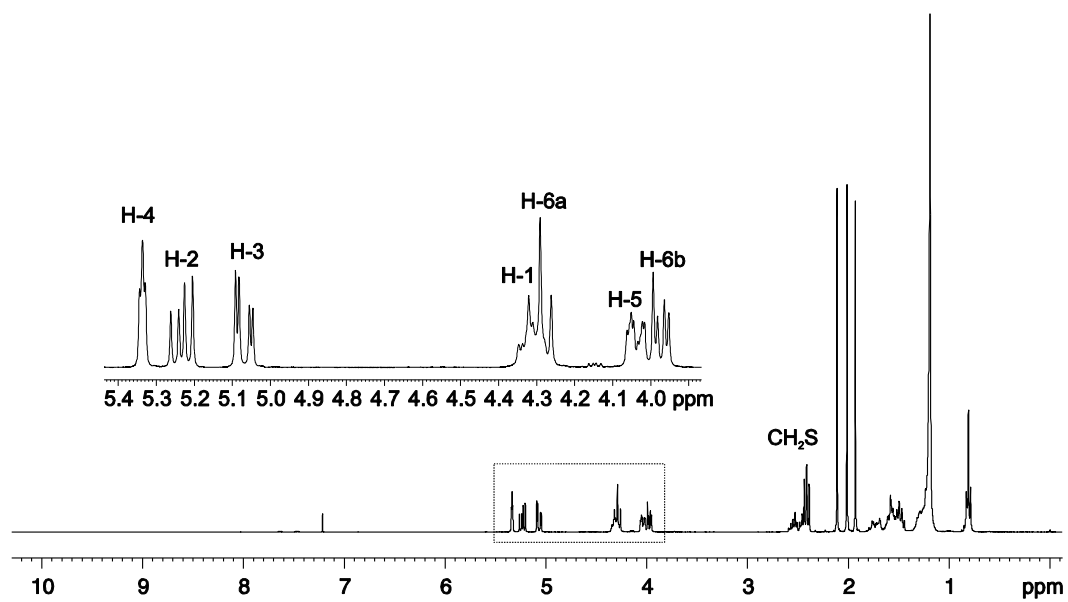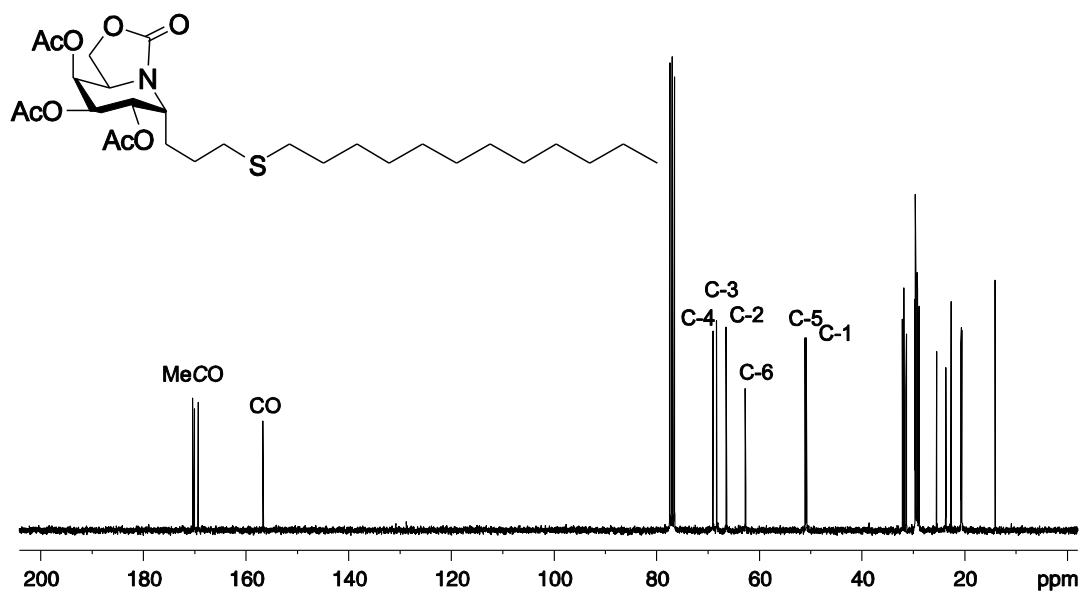

Figure S18. <sup>1</sup>H and <sup>13</sup>C NMR spectra (300 MHz and 75.5 MHz, CDCl<sub>3</sub>) of 26.

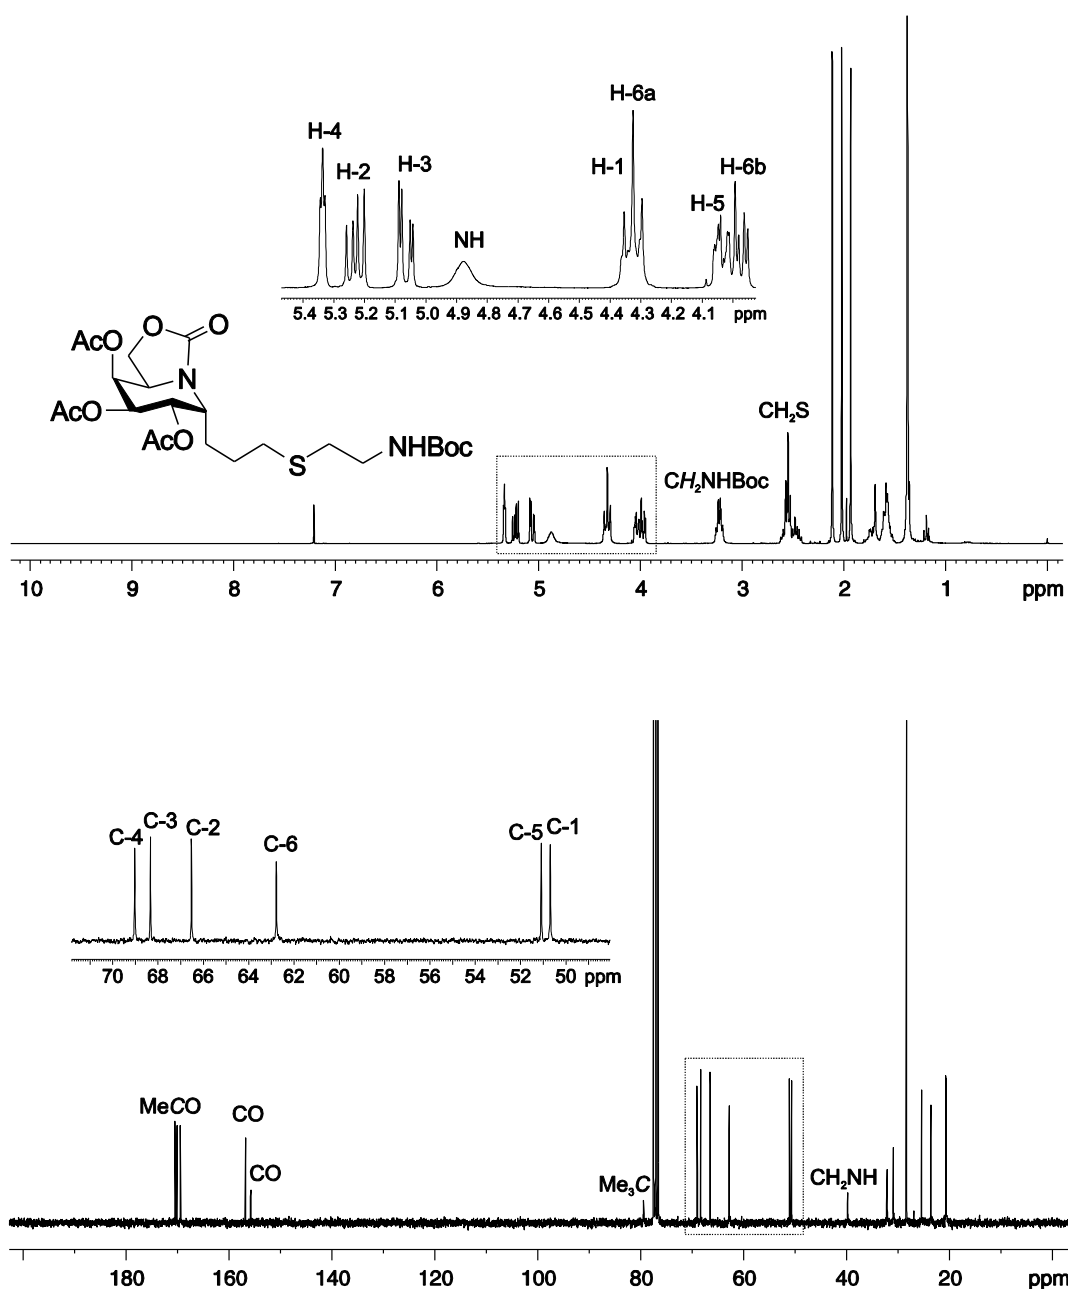

Figure S19.  $^1\text{H}$  and  $^{13}\text{C}$  NMR spectra (300 MHz and 75.5 MHz,  $\text{CDCl}_3$ ) of **27**.

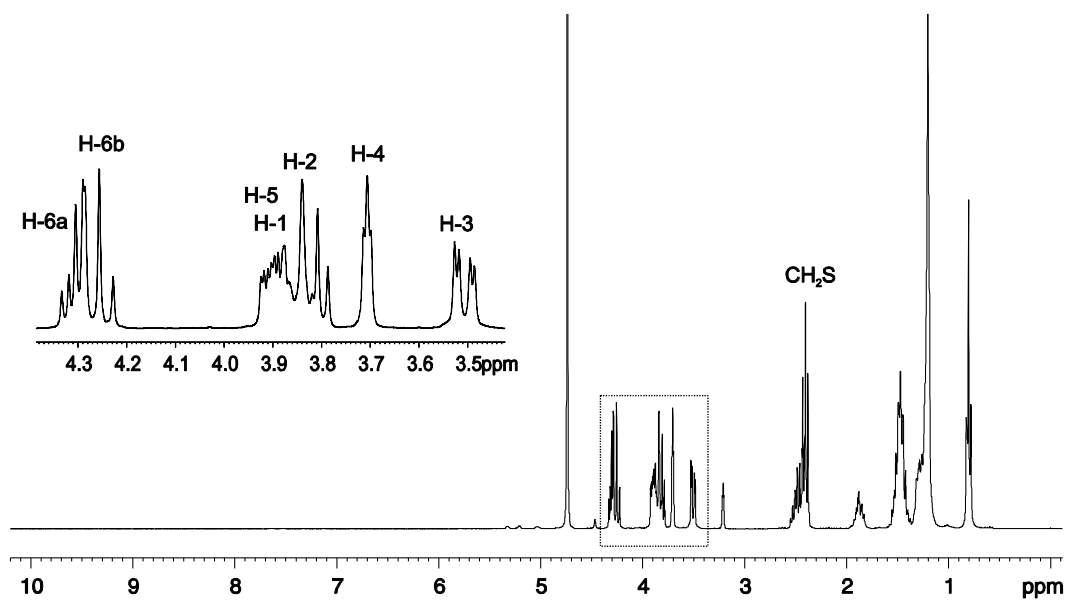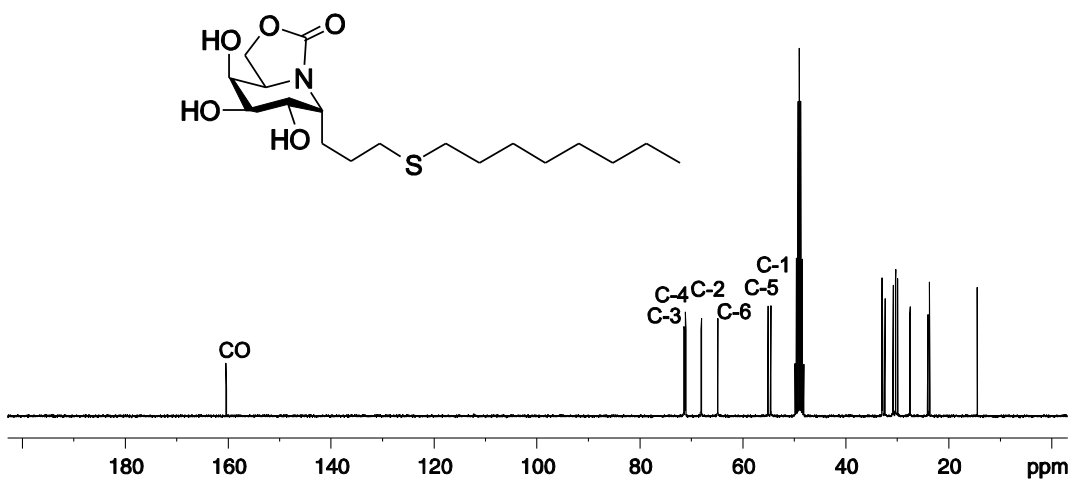

Figure S20. <sup>1</sup>H and <sup>13</sup>C NMR spectra (300 MHz and 75.5 MHz, CD<sub>3</sub>OD) of 7.

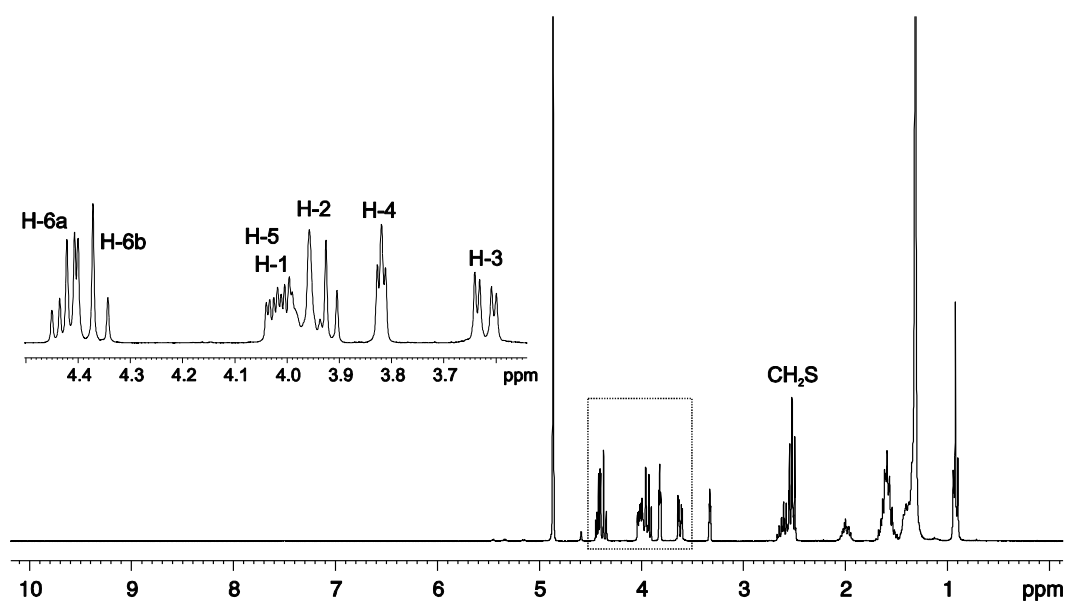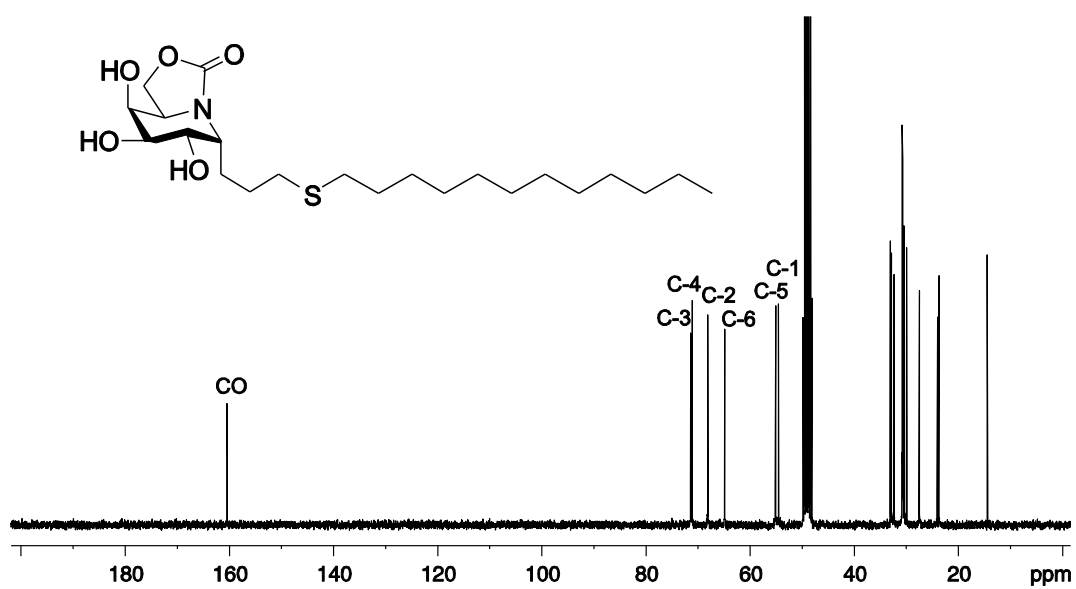

Figure S21.  $^1\text{H}$  and  $^{13}\text{C}$  NMR spectra (300 MHz and 75.5 MHz,  $\text{CD}_3\text{OD}$ ) of 8.

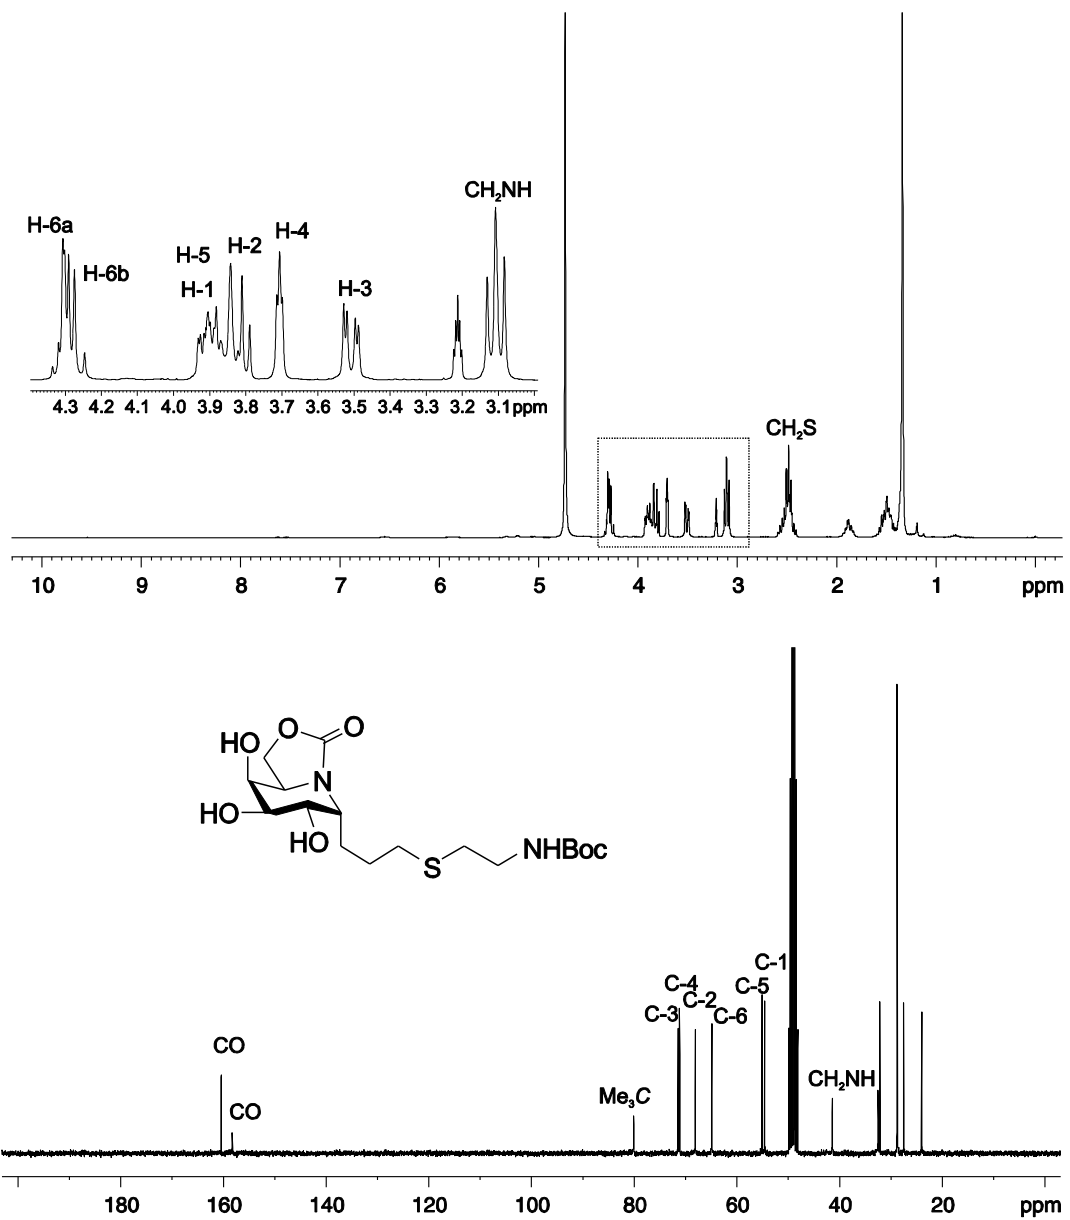

Figure S22.  $^1\text{H}$  and  $^{13}\text{C}$  NMR spectra (300 MHz and 75.5 MHz,  $\text{CD}_3\text{OD}$ ) of **9**.

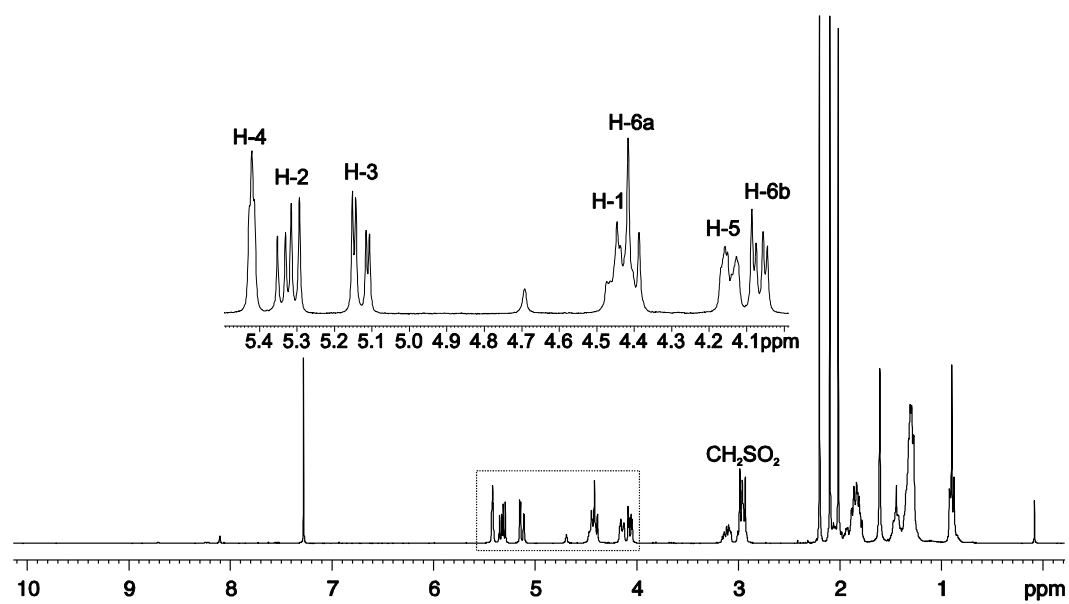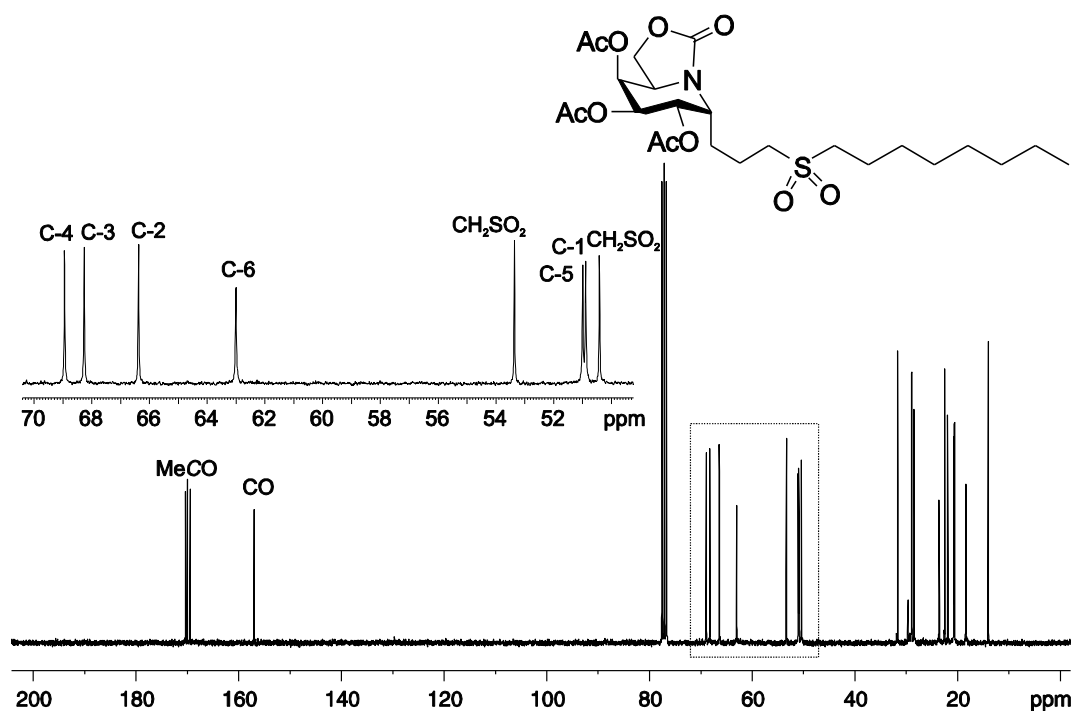

Figure S23. <sup>1</sup>H and <sup>13</sup>C NMR spectra (300 MHz and 75.5 MHz, CDCl<sub>3</sub>) of **28**.





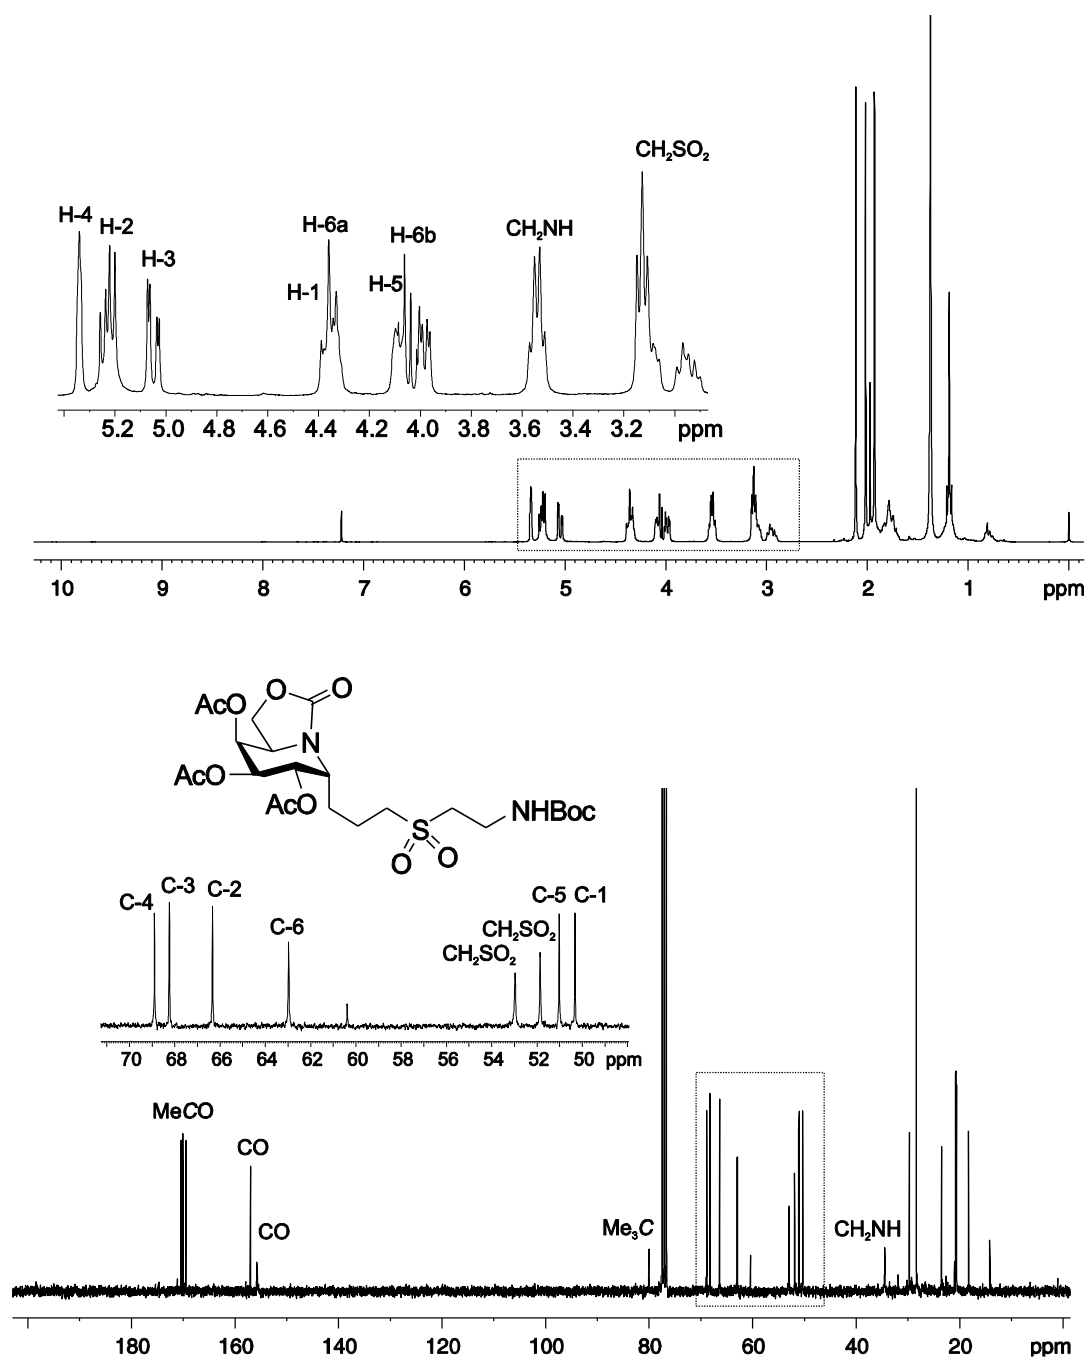

Figure S25.  $^1\text{H}$  and  $^{13}\text{C}$  NMR spectra (300 MHz and 75.5 MHz,  $\text{CDCl}_3$ ) of **30**.

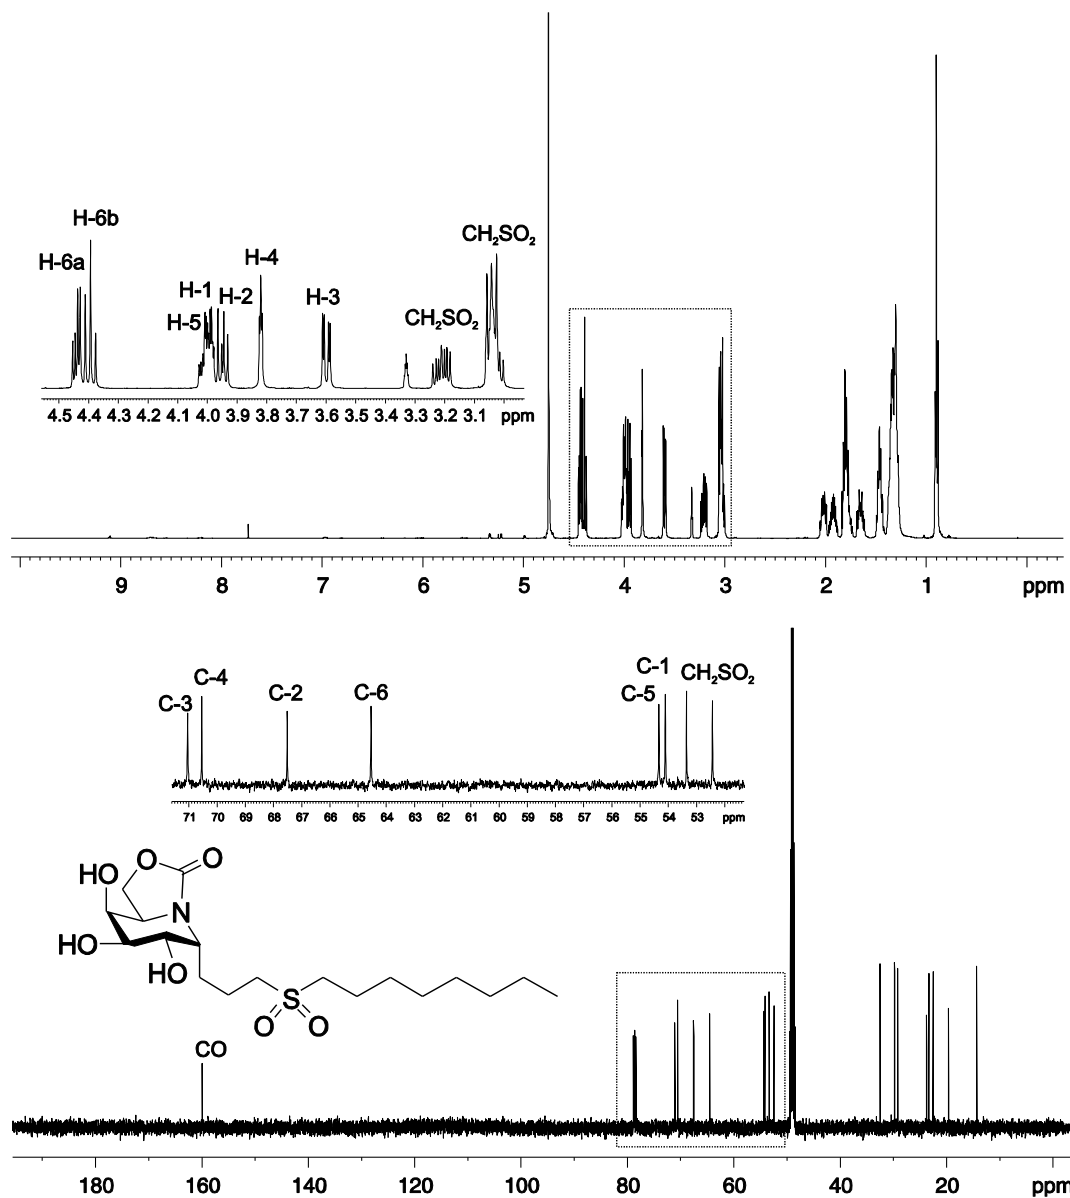

Figure S26.  $^1\text{H}$  and  $^{13}\text{C}$  NMR spectra (500 MHz and 125.7 MHz, 7:3  $\text{CD}_3\text{OD}-\text{CDCl}_3$ ) of **10**.

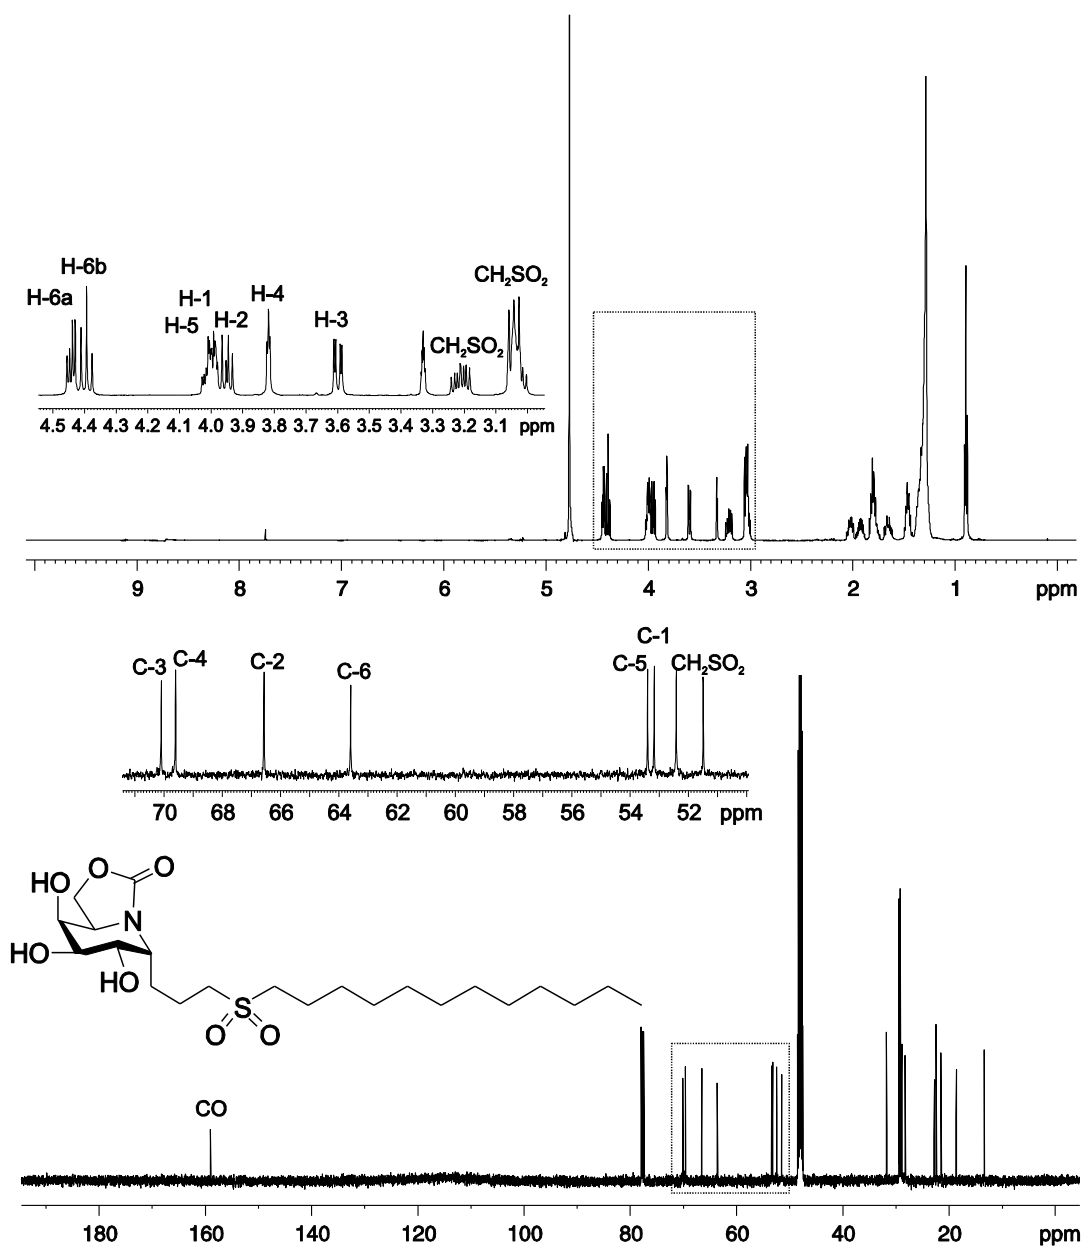

Figure S27.  $^1\text{H}$  and  $^{13}\text{C}$  NMR spectra (500 MHz and 125.7 MHz, 7:3  $\text{CD}_3\text{OD}-\text{CDCl}_3$ ) of **11**.

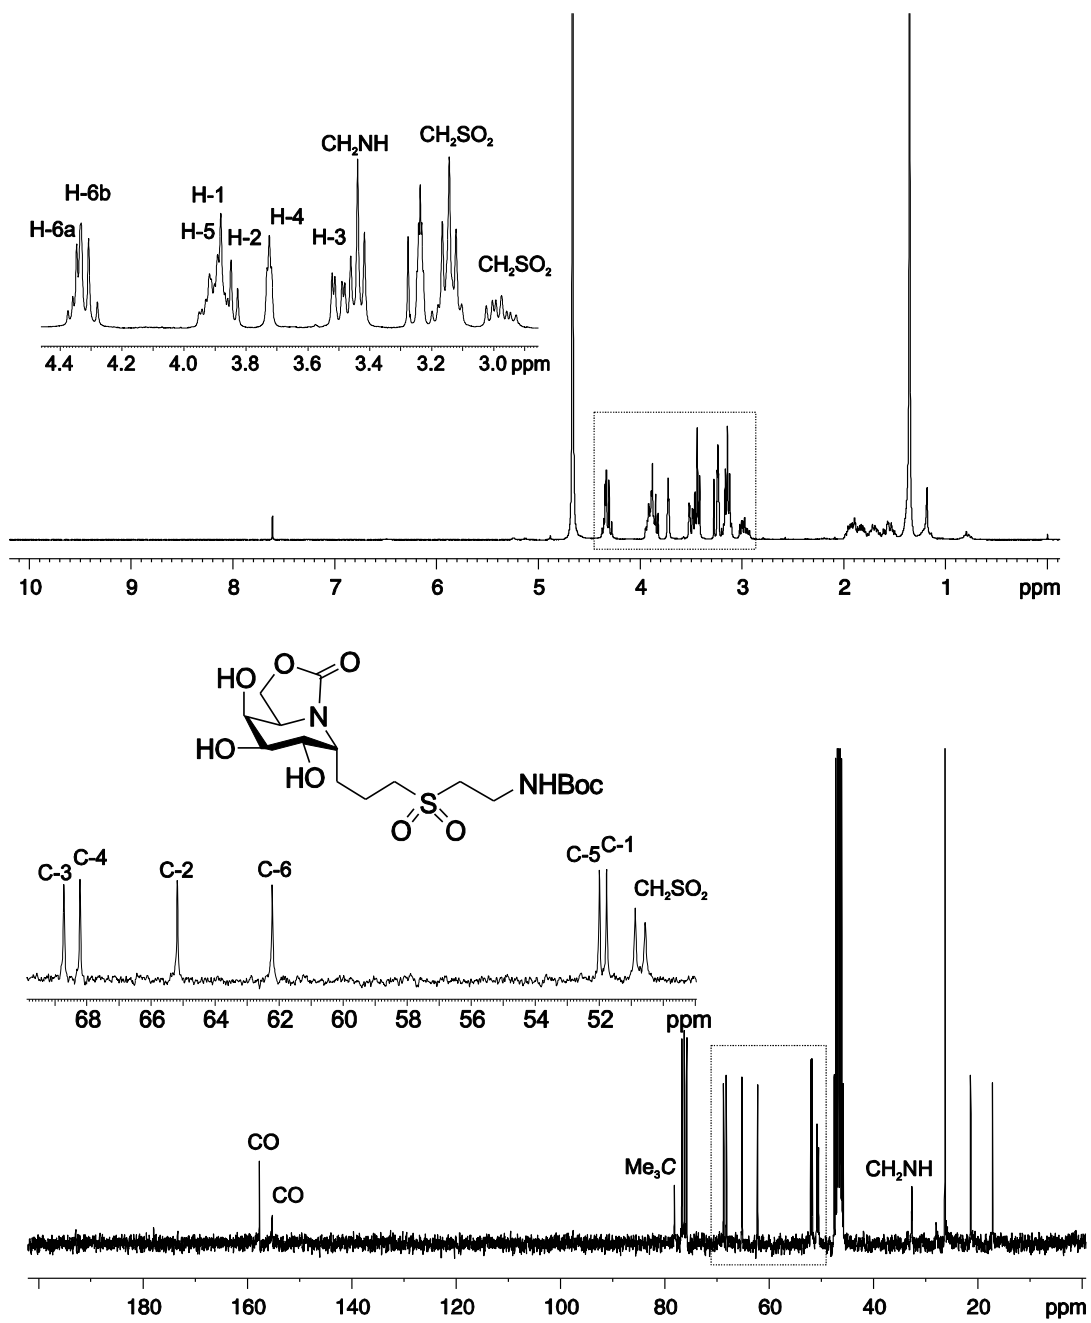

Figure S28.  $^1\text{H}$  and  $^{13}\text{C}$  NMR spectra (300 MHz and 75.5 MHz, 7:3  $\text{CD}_3\text{OD}-\text{CDCl}_3$ ) of **12**.

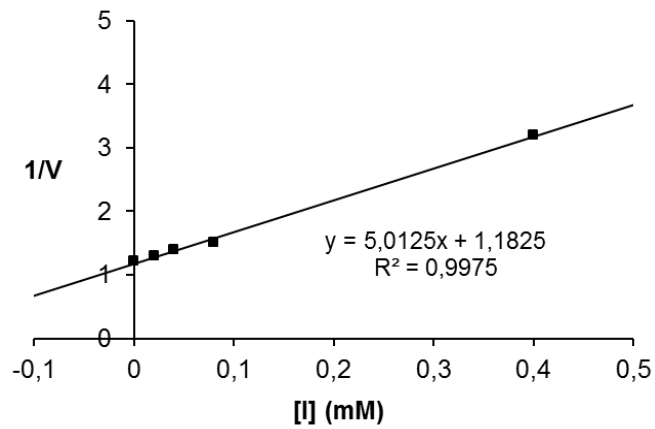

**Figure S29.** Dixon Plot for  $K_i$  determination (79  $\mu\text{M}$ ) of **15** against yeast maltase  $\alpha$ -glucosidase.

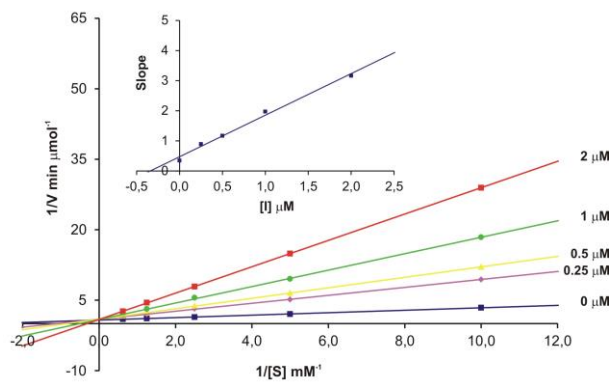

**Figure S30.** Lineweaver-Burk Plot for  $K_i$  determination (0.34  $\mu\text{M}$ ) of **1** against yeast maltase  $\alpha$ -glucosidase.

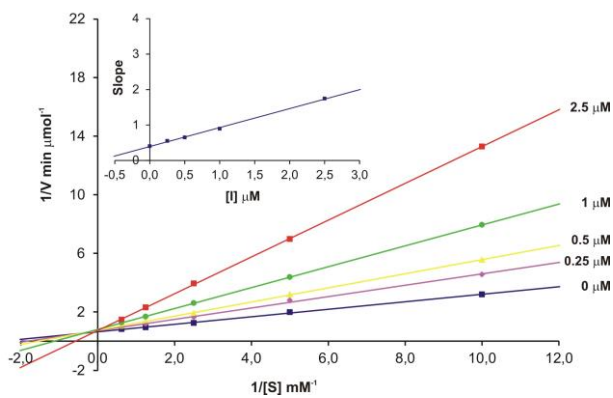

**Figure S31.** Lineweaver-Burk Plot for  $K_i$  determination (0.74  $\mu\text{M}$ ) of **2** against yeast maltase  $\alpha$ -glucosidase.

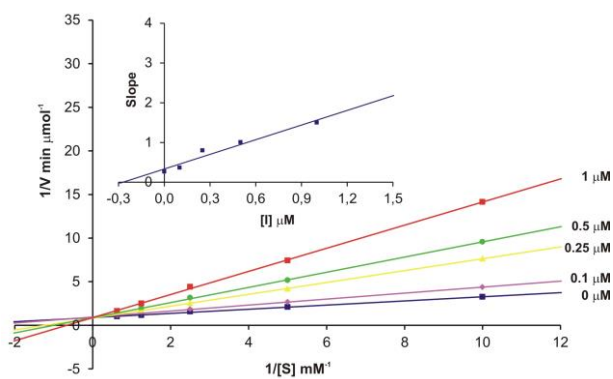

**Figure S32.** Lineweaver-Burk Plot for  $K_i$  determination (0.28  $\mu\text{M}$ ) of **3** against yeast maltase  $\alpha$ -glucosidase.

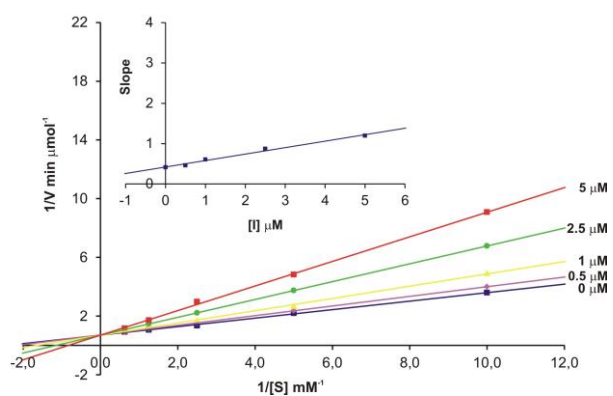

**Figure S33.** Lineweaver-Burk Plot for  $K_i$  determination (2.6  $\mu\text{M}$ ) of **4** against yeast maltase  $\alpha$ -glucosidase.

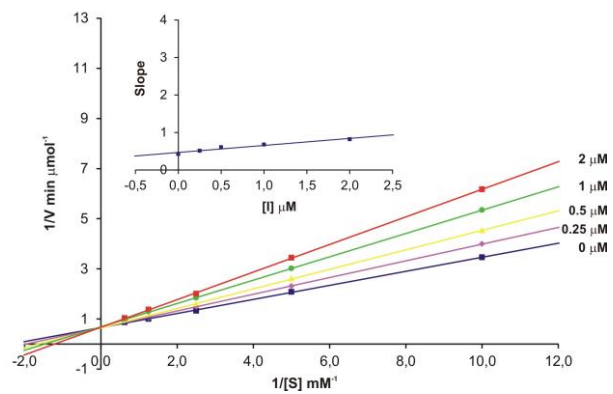

**Figure S34.** Lineweaver-Burk Plot for  $K_i$  determination (2.5  $\mu\text{M}$ ) of **5** against yeast maltase  $\alpha$ -glucosidase.

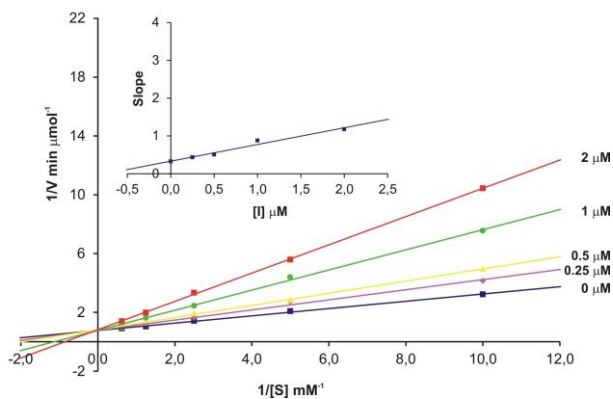

**Figure S35.** Lineweaver-Burk Plot for  $K_i$  determination ( $0.75 \mu\text{M}$ ) of **6** against yeast maltase  $\alpha$ -glucosidase.

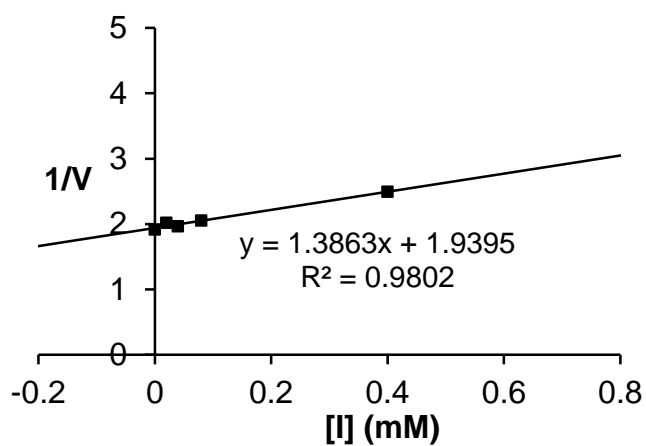

**Figure S36.** Dixon Plot for  $K_i$  determination ( $400 \mu\text{M}$ ) of **1** against bovine liver  $\beta$ -glucosidase.

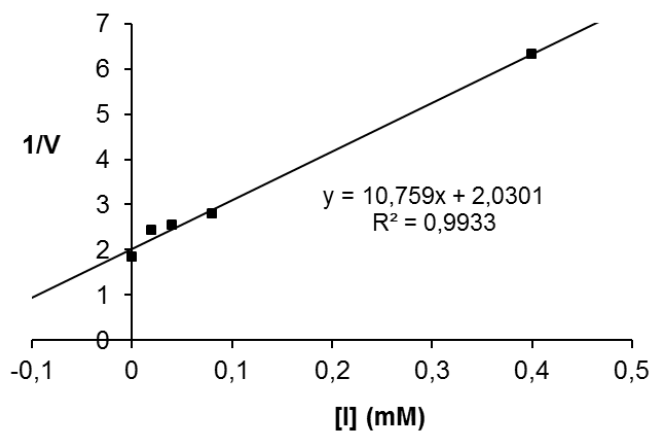

**Figure S37.** Dixon Plot for  $K_i$  determination ( $54 \mu\text{M}$ ) of **2** against bovine liver  $\beta$ -glucosidase.



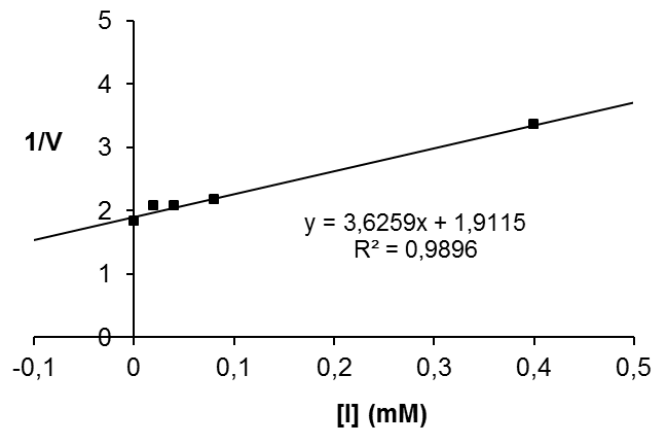

**Figure S38.** Dixon Plot for  $K_i$  determination (151  $\mu$ M) of **3** against bovine liver  $\beta$ -glucosidase.

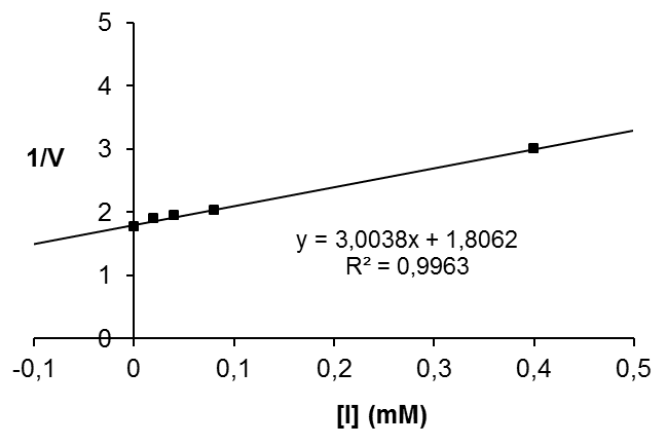

**Figure S39.** Dixon Plot for  $K_i$  determination (172  $\mu$ M) of **4** against bovine liver  $\beta$ -glucosidase.

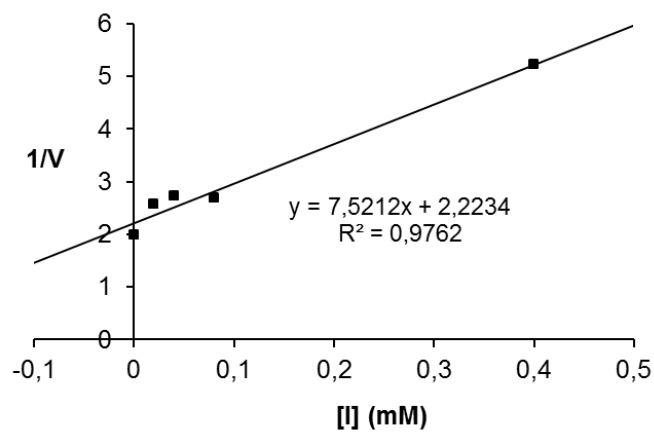

**Figure S40.** Dixon Plot for  $K_i$  determination (85  $\mu$ M) of **5** against bovine liver  $\beta$ -glucosidase.

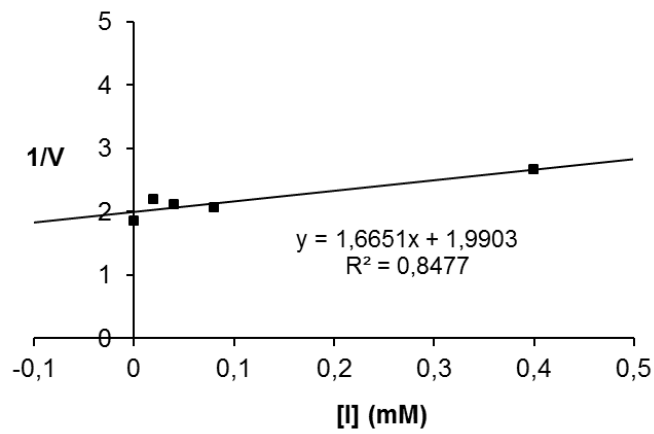

**Figure S41.** Dixon Plot for  $K_i$  determination (342  $\mu\text{M}$ ) of **6** against bovine liver  $\beta$ -glucosidase.

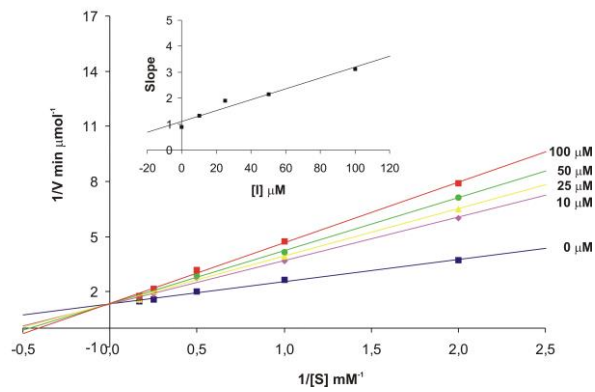

**Figure S42.** Lineweaver-Burk Plot for  $K_i$  determination (53  $\mu\text{M}$ ) of **8** against bovine liver  $\beta$ -glucosidase.

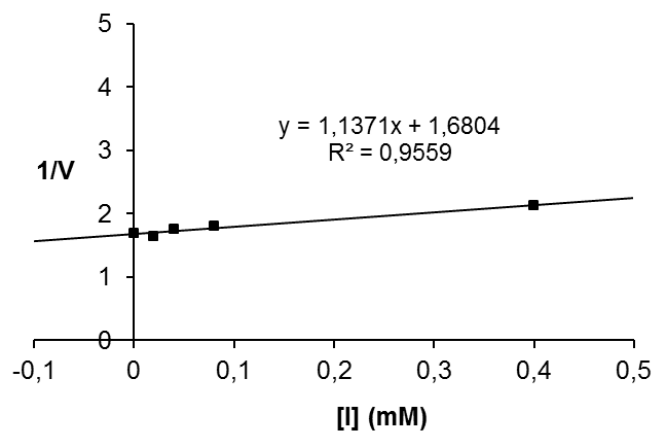

**Figure S43.** Dixon Plot for  $K_i$  determination (422  $\mu\text{M}$ ) of **10** against bovine liver  $\beta$ -glucosidase.

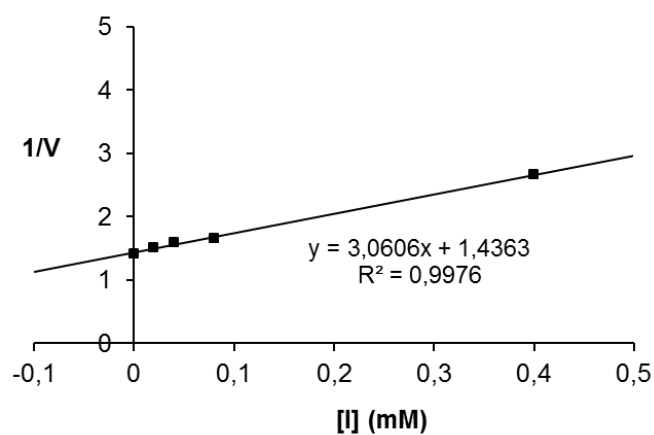

**Figure S44.** Dixon Plot for  $K_i$  determination (134  $\mu\text{M}$ ) of **11** against bovine liver  $\beta$ -glucosidase.

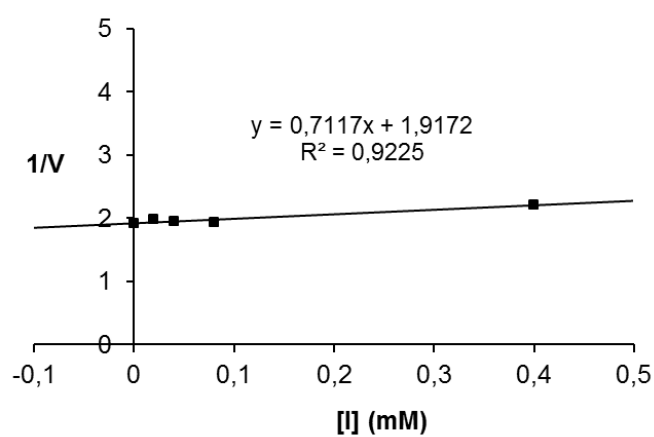

**Figure S45.** Dixon Plot for  $K_i$  determination (770  $\mu\text{M}$ ) of **12** against bovine liver  $\beta$ -glucosidase.

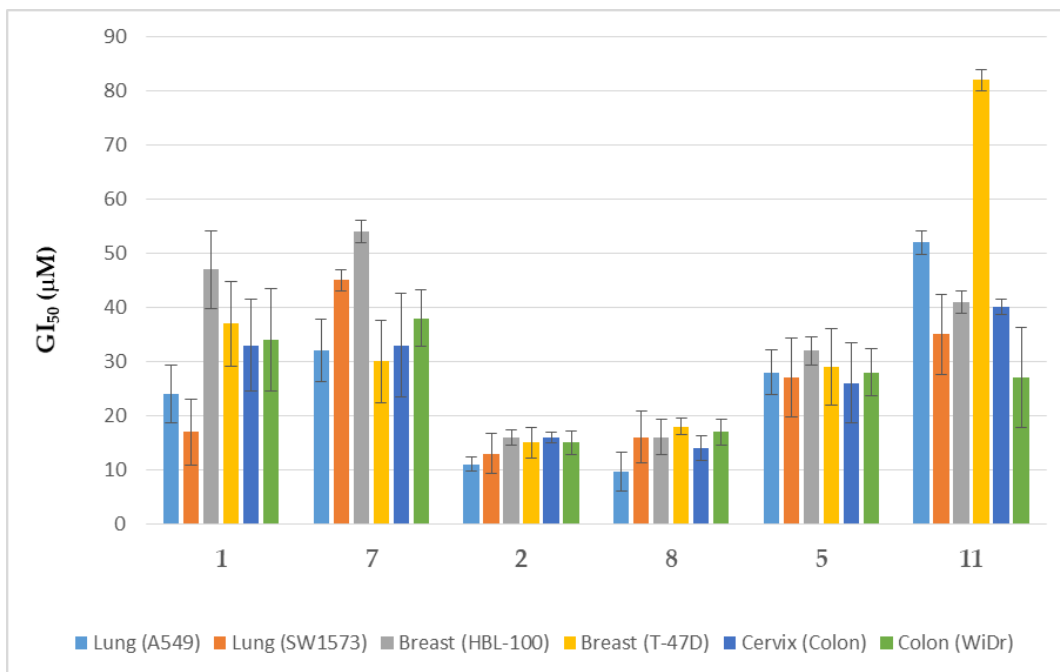

**FigureS46.** Anti-proliferative activity ( $GI_{50}$ ) of **1**, **2**, **5**, **7**, **8**, **11** against different human solid tumor cell lines. Compounds **3**, **4**, **6**, **9**, **10** and **12** did not achieved 50% growth inhibition at the highest concentration tested ( $100 \mu\text{M}$ ).
